# Supplementary material for: Spongia Sponges: Unabated Sources of Novel Secondary Metabolites
Source: MDPI journal article supplement (doi:10.3390/md22050213), 2024-05-07
Supplement: s1 [file s1]

# Supplementary Materials

**Table S1.** Secondary metabolites of the genus *Spongia* from mid-2015 to the beginning of 2024.

| No | Name                                                                | Class         | Species                    | Locality                          | Bioassays                                                                                                                                                                                                                                                                                        | Ref  |
|----|---------------------------------------------------------------------|---------------|----------------------------|-----------------------------------|--------------------------------------------------------------------------------------------------------------------------------------------------------------------------------------------------------------------------------------------------------------------------------------------------|------|
| 1  | (+/-)-spongiterpene                                                 | sesquiterpene | <i>Spongia</i> sp.         | Zhanjiang, Guangdong, China       | — <sup>1</sup>                                                                                                                                                                                                                                                                                   | [14] |
| 2  | dehydrololiolide                                                    | sesquiterpene | <i>Spongia</i> sp.         | Zhanjiang, Guangdong, China       | —                                                                                                                                                                                                                                                                                                | [14] |
| 3  | loliolide                                                           | sesquiterpene | <i>Spongia</i> sp.         | Zhanjiang, Guangdong, China       | no cytotoxicity against K562, A549, Hela, HT29, SK-BR-3, Huh7, RBL-2H3 and PC3 cell lines (MTT assay, triplicate)                                                                                                                                                                                | [14] |
| 4  | dehydrovomifoliol                                                   | sesquiterpene | <i>Spongia</i> sp.         | Zhanjiang, Guangdong, China       | —                                                                                                                                                                                                                                                                                                | [14] |
| 5  | 3 $\beta$ -hydroxy-5 $\alpha$ ,6 $\alpha$ -epoxy-7-megastimen-9-one | sesquiterpene | <i>Spongia</i> sp.         | Zhanjiang, Guangdong, China       | —                                                                                                                                                                                                                                                                                                | [14] |
| 6  | pacifenol                                                           | sesquiterpene | <i>Spongia</i> sp.         | Jeddah, Saudi Arabia              | no cytotoxicity against Huh7 cell line (MTT assay, triplicate); no antibacterial activity against <i>Staphylococcus aureus</i> ; no anti-inflammatory activity toward inhibiting superoxide anion (O <sub>2</sub> <sup>-</sup> ) generation and elastase release (IC <sub>50</sub> > 20 $\mu$ M) | [15] |
| 7  | ceylonamide A                                                       | diterpene     | <i>Spongia ceylonensis</i> | Tiwoho, North Sulawesi, Indonesia | inhibitory against RANKL-induced osteoclastogenesis (IC <sub>50</sub> = 13 $\mu$ M)                                                                                                                                                                                                              | [17] |
|    |                                                                     |               |                            |                                   | no inhibitory against ubiquitin-specific protease 7 (USP7) (IC <sub>50</sub> > 50 $\mu$ M)                                                                                                                                                                                                       | [19] |
| 8  | ceylonamide B                                                       | diterpene     | <i>S. ceylonensis</i>      | Tiwoho, North Sulawesi, Indonesia | inhibitory against RANKL-induced osteoclastogenesis (IC <sub>50</sub> = 18 $\mu$ M)                                                                                                                                                                                                              | [17] |
|    |                                                                     |               |                            |                                   | no inhibitory against USP7 (IC <sub>50</sub> > 50 $\mu$ M)                                                                                                                                                                                                                                       | [19] |
| 9  | ceylonamide C                                                       | diterpene     | <i>S. ceylonensis</i>      | Tiwoho, North Sulawesi, Indonesia | no inhibitory against RANKL-induced osteoclastogenesis (IC <sub>50</sub> > 50 $\mu$ M)                                                                                                                                                                                                           | [17] |
|    |                                                                     |               |                            |                                   | no inhibitory against USP7 (IC <sub>50</sub> > 50 $\mu$ M)                                                                                                                                                                                                                                       | [19] |
| 10 | ceylonamide D                                                       | diterpene     | <i>S. ceylonensis</i>      | Tiwoho, North Sulawesi, Indonesia | no inhibitory against RANKL-induced osteoclastogenesis (IC <sub>50</sub> > 50 $\mu$ M)                                                                                                                                                                                                           | [17] |
|    |                                                                     |               |                            |                                   | no inhibitory against USP7 (IC <sub>50</sub> > 50 $\mu$ M)                                                                                                                                                                                                                                       | [19] |
| 11 | ceylonamide E                                                       | diterpene     | <i>S. ceylonensis</i>      | Tiwoho, North Sulawesi, Indonesia | no inhibitory against RANKL-induced osteoclastogenesis (IC <sub>50</sub> > 50 $\mu$ M)                                                                                                                                                                                                           | [17] |
|    |                                                                     |               |                            |                                   | no inhibitory against USP7 (IC <sub>50</sub> > 50 $\mu$ M)                                                                                                                                                                                                                                       | [19] |
| 12 | ceylonamide F                                                       | diterpene     | <i>S. ceylonensis</i>      | Tiwoho, North Sulawesi, Indonesia | no inhibitory against RANKL-induced osteoclastogenesis (IC <sub>50</sub> > 50 $\mu$ M)                                                                                                                                                                                                           | [17] |

| No | Name                                     | Class     | Species               | Locality                          | Bioassays                                                                         | Ref  |
|----|------------------------------------------|-----------|-----------------------|-----------------------------------|-----------------------------------------------------------------------------------|------|
|    |                                          |           |                       |                                   | no inhibitory against USP7 (IC <sub>50</sub> > 50 µM)                             | [19] |
|    |                                          |           | <i>Spongia</i> sp.    | Biak, Indonesia                   | cytotoxicity against DU145 cell line (IC <sub>50</sub> = 18.8 µM)                 | [23] |
| 13 | 15α,16-dimethoxyspongi-13-en-19-oic acid | diterpene | <i>S. ceylonensis</i> | Tiwoho, North Sulawesi, Indonesia | no inhibitory against RANKL-induced osteoclastogenesis (IC <sub>50</sub> > 50 µM) | [17] |
| 14 | haumanamide                              | diterpene | <i>S. ceylonensis</i> | Tiwoho, North Sulawesi, Indonesia | no inhibitory against RANKL-induced osteoclastogenesis (IC <sub>50</sub> > 50 µM) | [17] |
| 15 | 15-oxospongi-13-en-19-oic acid           | diterpene | <i>S. ceylonensis</i> | Tiwoho, North Sulawesi, Indonesia | no inhibitory against RANKL-induced osteoclastogenesis (IC <sub>50</sub> > 50 µM) | [17] |
|    |                                          |           |                       |                                   | no inhibitory against USP7 (IC <sub>50</sub> > 50 µM)                             | [19] |
| 16 | 16-oxospongi-13-en-19-oic acid           | diterpene | <i>S. ceylonensis</i> | Tiwoho, North Sulawesi, Indonesia | no inhibitory against RANKL-induced osteoclastogenesis (IC <sub>50</sub> > 50 µM) | [17] |
|    |                                          |           |                       |                                   | no inhibitory against USP7 (IC <sub>50</sub> > 50 µM)                             | [19] |
| 17 | spongiabutenolide A                      | diterpene | <i>S. ceylonensis</i> | Tiwoho, North Sulawesi, Indonesia | no inhibitory against RANKL-induced osteoclastogenesis (IC <sub>50</sub> > 50 µM) | [17] |
|    |                                          |           |                       |                                   | no inhibitory against USP7 (IC <sub>50</sub> > 50 µM)                             | [19] |
| 18 | spongiabutenolide B                      | diterpene | <i>S. ceylonensis</i> | Tiwoho, North Sulawesi, Indonesia | no inhibitory against RANKL-induced osteoclastogenesis (IC <sub>50</sub> > 50 µM) | [17] |
|    |                                          |           |                       |                                   | no inhibitory against USP7 (IC <sub>50</sub> > 50 µM)                             | [19] |
| 19 | spongia-13(16),14-dien-19-oic acid       | diterpene | <i>S. ceylonensis</i> | Tiwoho, North Sulawesi, Indonesia | no inhibitory against RANKL-induced osteoclastogenesis (IC <sub>50</sub> > 50 µM) | [17] |
|    |                                          |           |                       |                                   | no inhibitory against USP7 (IC <sub>50</sub> > 50 µM)                             | [19] |
| 20 | spongiadiol                              | diterpene | <i>S. ceylonensis</i> | Tiwoho, North Sulawesi, Indonesia | no inhibitory against RANKL-induced osteoclastogenesis (IC <sub>50</sub> > 50 µM) | [17] |
| 21 | isospongiadiol                           | diterpene | <i>S. ceylonensis</i> | Tiwoho, North Sulawesi, Indonesia | no inhibitory against RANKL-induced osteoclastogenesis (IC <sub>50</sub> > 50 µM) | [17] |
| 22 | ceylonin A                               | diterpene | <i>S. ceylonensis</i> | Tiwoho, North Sulawesi, Indonesia | inhibitory against RANKL-induced osteoclastogenesis (inhibition rates 70%)        | [18] |
|    |                                          |           |                       |                                   | no inhibitory against USP7 (IC <sub>50</sub> > 50 µM)                             | [19] |
| 23 | ceylonin B                               | diterpene | <i>S. ceylonensis</i> | Tiwoho, North Sulawesi, Indonesia | no inhibitory against RANKL-induced osteoclastogenesis (IC <sub>50</sub> > 50 µM) | [18] |
|    |                                          |           |                       |                                   | no inhibitory against USP7 (IC <sub>50</sub> > 50 µM)                             | [19] |
| 24 | ceylonin C                               | diterpene | <i>S. ceylonensis</i> | Tiwoho, North Sulawesi, Indonesia | no inhibitory against RANKL-induced osteoclastogenesis (IC <sub>50</sub> > 50 µM) | [18] |
|    |                                          |           |                       |                                   | no inhibitory against USP7 (IC <sub>50</sub> > 50 µM)                             | [19] |
| 25 | ceylonin D                               | diterpene | <i>S. ceylonensis</i> | Tiwoho, North Sulawesi, Indonesia | inhibitory against RANKL-induced osteo-                                           | [18] |

| No | Name                                                     | Class     | Species                    | Locality                          | Bioassays                                                                                                                                            | Ref  |
|----|----------------------------------------------------------|-----------|----------------------------|-----------------------------------|------------------------------------------------------------------------------------------------------------------------------------------------------|------|
|    |                                                          |           |                            |                                   | clastogenesis (inhibi<br>inhibition rates 28%)                                                                                                       |      |
|    |                                                          |           |                            |                                   | no inhibitory against USP7 (IC <sub>50</sub> > 50 µM)                                                                                                | [19] |
| 26 | ceylonin E                                               | diterpene | <i>S. ceylonensis</i>      | Tiwoho, North Sulawesi, Indonesia | inhibitory against RANKL-induced osteo-<br>clastogenesis (inhibi<br>inhibition rates 47%)                                                            | [18] |
|    |                                                          |           |                            |                                   | no inhibitory against USP7 (IC <sub>50</sub> > 50 µM)                                                                                                | [19] |
| 27 | ceylonin F                                               | diterpene | <i>S. ceylonensis</i>      | Tiwoho, North Sulawesi, Indonesia | inhibitory against RANKL-induced osteo-<br>clastogenesis (inhibi<br>inhibition rates 31%)                                                            | [18] |
|    |                                                          |           |                            |                                   | no inhibitory against USP7 (IC <sub>50</sub> > 50 µM)                                                                                                | [19] |
| 28 | ceylonin G                                               | diterpene | <i>S. ceylonensis</i>      | Tiwoho, North Sulawesi, Indonesia | no inhibitory against USP7 (IC <sub>50</sub> > 50 µM)                                                                                                | [19] |
| 29 | ceylonin H                                               | diterpene | <i>S. ceylonensis</i>      | Tiwoho, North Sulawesi, Indonesia | no inhibitory against USP7 (IC <sub>50</sub> > 50 µM)                                                                                                | [19] |
| 30 | ceylonin I                                               | diterpene | <i>S. ceylonensis</i>      | Tiwoho, North Sulawesi, Indonesia | no inhibitory against USP7 (IC <sub>50</sub> > 50 µM)                                                                                                | [19] |
| 31 | <i>ent</i> -13-norisocopalen-15-al-18-oic acid           | diterpene | <i>S. ceylonensis</i>      | Tiwoho, North Sulawesi, Indonesia | inhibitory against USP7 (IC <sub>50</sub> = 8.2 µM)                                                                                                  | [19] |
| 32 | 3-nor-spongiolide A                                      | diterpene | <i>Spongia officinalis</i> | Weizhou Island, Guangxi, China    | no cytotoxicity against HL-60 cell line<br>(MTT assay, triplicate)                                                                                   | [20] |
| 33 | spongiolide A                                            | diterpene | <i>S. officinalis</i>      | Weizhou Island, Guangxi, China    | no cytotoxicity against HL-60 cell line<br>(MTT assay, triplicate)                                                                                   | [20] |
| 34 | spongiolide B                                            | diterpene | <i>S. officinalis</i>      | Weizhou Island, Guangxi, China    | no cytotoxicity against HL-60 cell line<br>(MTT assay, triplicate)                                                                                   | [20] |
| 35 | spongia-13(16),14-diene                                  | diterpene | <i>S. officinalis</i>      | Weizhou Island, Guangxi, China    | no cytotoxicity against HL-60 cell line<br>(MTT assay, triplicate)                                                                                   | [20] |
| 36 | 18-nor-3,17-dihydroxyspongia-3,13<br>(16),14-trien-2-one | diterpene | <i>S. officinalis</i>      | Weizhou Island, Guangxi, China    | no cytotoxicity against HL-60 cell line<br>(MTT assay, triplicate)                                                                                   | [20] |
| 37 | spongiatriol                                             | diterpene | <i>S. officinalis</i>      | Weizhou Island, Guangxi, China    | no cytotoxicity against HL-60 cell line<br>(MTT assay, triplicate)                                                                                   | [20] |
|    |                                                          |           |                            | Ximao Island, Hainan, China       | —                                                                                                                                                    | [22] |
| 38 | epispongiatriol                                          | diterpene | <i>S. officinalis</i>      | Weizhou Island, Guangxi, China    | no cytotoxicity against HL-60 cell line<br>(MTT assay, triplicate)                                                                                   | [20] |
|    |                                                          |           |                            | Ximao Island, Hainan, China       | anti-inflammatory activity toward inhib-<br>iting lipopolysaccharide (LPS)-induced<br>nitric oxide (NO) production (IC <sub>50</sub> = 20 ± 2<br>µM) | [22] |
| 39 | isospongiatriol                                          | diterpene | <i>S. officinalis</i>      | Weizhou Island, Guangxi, China    | no cytotoxicity against HL-60 cell line<br>(MTT assay, triplicate)                                                                                   | [20] |
|    |                                                          |           |                            | Ximao Island, Hainan, China       | no anti-inflammatory activity toward in-<br>hibiting LPS-induced NO production<br>(IC <sub>50</sub> >60 µM)                                          | [22] |

| No | Name                                            | Class     | Species               | Locality                                                 | Bioassays                                                                                                                                                                                                            | Ref  |
|----|-------------------------------------------------|-----------|-----------------------|----------------------------------------------------------|----------------------------------------------------------------------------------------------------------------------------------------------------------------------------------------------------------------------|------|
|    |                                                 |           |                       | Shui Niupo Village, Danzhou City, Hainan Province, China | no cytotoxicity against K562, H69AR, ASPC-1 and MDA-MB-231 cell lines (SRB assay and MTT assay, triplicate); no signalling inhibition of HIF-1, Wnt and STAT3/NF- $\kappa$ B, or activation of PPAR $\gamma$ and p53 | [28] |
| 40 | 17,19-dihydroxyspongia-13(16),14-dien-2,3-dione | diterpene | <i>S. officinalis</i> | Weizhou Island, Guangxi, China                           | no cytotoxicity against HL-60 cell line (MTT assay, triplicate)                                                                                                                                                      | [20] |
| 41 | spongiain A                                     | diterpene | <i>Spongia</i> sp.    | Zhanjiang, Guangdong, China                              | no cytotoxicity against K562, A549, Hela, HT29, SK-BR-3, Huh7, RBL-2H3 and PC3 cell lines (MTT assay, triplicate)                                                                                                    | [21] |
| 42 | spongiain B                                     | diterpene | <i>Spongia</i> sp.    | Zhanjiang, Guangdong, China                              | no cytotoxicity against K562, A549, Hela, HT29, SK-BR-3, Huh7, RBL-2H3 and PC3 cell lines (MTT assay, triplicate)                                                                                                    | [21] |
| 43 | spongiain C                                     | diterpene | <i>Spongia</i> sp.    | Zhanjiang, Guangdong, China                              | no cytotoxicity against K562, A549, Hela, HT29, SK-BR-3, Huh7, RBL-2H3 and PC3 cell lines (MTT assay, triplicate)                                                                                                    | [21] |
| 44 | spongiain D                                     | diterpene | <i>Spongia</i> sp.    | Zhanjiang, Guangdong, China                              | no cytotoxicity against K562, A549, Hela, HT29, SK-BR-3, Huh7, RBL-2H3 and PC3 cell lines (MTT assay, triplicate)                                                                                                    | [21] |
| 45 | spongiain E                                     | diterpene | <i>Spongia</i> sp.    | Zhanjiang, Guangdong, China                              | no cytotoxicity against K562, A549, Hela, HT29, SK-BR-3, Huh7, RBL-2H3 and PC3 cell lines (MTT assay, triplicate)                                                                                                    | [21] |
| 46 | spongiain F                                     | diterpene | <i>Spongia</i> sp.    | Zhanjiang, Guangdong, China                              | no cytotoxicity against K562, A549, Hela, HT29, SK-BR-3, Huh7, RBL-2H3 and PC3 cell lines (MTT assay, triplicate)                                                                                                    | [21] |
| 47 | spongiain G                                     | diterpene | <i>Spongia</i> sp.    | Zhanjiang, Guangdong, China                              | no cytotoxicity against K562, A549, Hela, HT29, SK-BR-3, Huh7, RBL-2H3 and PC3 cell lines (MTT assay, triplicate)                                                                                                    | [21] |
| 48 | sponalactone                                    | diterpene | <i>S. officinalis</i> | Ximao Island, Hainan, China                              | anti-inflammatory activity toward inhibiting LPS-induced NO production (IC <sub>50</sub> = 32 $\pm$ 4 $\mu$ M)                                                                                                       | [22] |
| 49 | 17-O-acetylepisongiatriol                       | diterpene | <i>S. officinalis</i> | Ximao Island, Hainan, China                              | anti-inflammatory activity toward inhibiting LPS-induced NO production (IC <sub>50</sub> = 15 $\pm$ 3 $\mu$ M)                                                                                                       | [22] |
| 50 | 17-O-acetylsongiatriol                          | diterpene | <i>S. officinalis</i> | Ximao Island, Hainan, China                              | anti-inflammatory activity toward inhibiting LPS-induced NO production (IC <sub>50</sub> =                                                                                                                           | [22] |

| No | Name                                           | Class     | Species                    | Locality                    | Bioassays                                                                                                                                                                                                                                                                                                                                  | Ref  |
|----|------------------------------------------------|-----------|----------------------------|-----------------------------|--------------------------------------------------------------------------------------------------------------------------------------------------------------------------------------------------------------------------------------------------------------------------------------------------------------------------------------------|------|
|    |                                                |           |                            |                             | 12 ± 2 µM)                                                                                                                                                                                                                                                                                                                                 |      |
| 51 | 15α,16α-dimethoxy-15,16-dihydroepispongatriol  | diterpene | <i>S. officinalis</i>      | Ximao Island, Hainan, China | anti-inflammatory activity toward inhibiting LPS-induced NO production (IC <sub>50</sub> = 22 ± 3 µM)                                                                                                                                                                                                                                      | [22] |
| 52 | 15α-ethoxyepispongatriol-16(15 <i>H</i> )-one  | diterpene | <i>S. officinalis</i>      | Ximao Island, Hainan, China | anti-inflammatory activity toward inhibiting LPS-induced NO production (IC <sub>50</sub> = 12 ± 2 µM)                                                                                                                                                                                                                                      | [22] |
| 53 | ceylonamide G                                  | diterpene | <i>Spongia</i> sp.         | Biak, Indonesia             | cytotoxicity against DU145 cell line (IC <sub>50</sub> = 6.9 µM) (MTT assay, triplicate)                                                                                                                                                                                                                                                   | [23] |
| 54 | ceylonamide H                                  | diterpene | <i>Spongia</i> sp.         | Biak, Indonesia             | cytotoxicity against DU145 cell line (IC <sub>50</sub> > 100 µM) (MTT assay, triplicate)                                                                                                                                                                                                                                                   | [23] |
|    |                                                |           | <i>Spongia irregularis</i> | Ras Mohamed, Sinai, Egypt   | no inhibitory against hepatitis C virus (HCV) (Molecular docking calculations)                                                                                                                                                                                                                                                             | [31] |
| 55 | ceylonamide I                                  | diterpene | <i>Spongia</i> sp.         | Biak, Indonesia             | cytotoxicity against DU145 cell line (IC <sub>50</sub> > 100 µM) (MTT assay, triplicate)                                                                                                                                                                                                                                                   | [23] |
| 56 | 3β-hydroxyspongia-13(16),14-dien-2-one         | diterpene | <i>Spongia tubulifera</i>  | Mexican Caribbean           | cytotoxicity against A549, A2058, HepG2 and MiaPaca-2 cell lines (IC <sub>50</sub> = 88.1 ± 7.9, 71.4 ± 2.5, 91.3 ± 15.8 and 90.0 ± 44.8 µM, respectively) (MTT assay, triplicate); no antibacterial activity against <i>Acinetobacter baumannii</i> , <i>Pseudomonas aeruginosa</i> , <i>Klebsiella pneumoniae</i> , and <i>S. aureus</i> | [24] |
|    |                                                |           |                            |                             | mitochondrial-mediated neuroprotective properties through direct interaction with cyclophilin D                                                                                                                                                                                                                                            | [25] |
| 57 | 19-dehydroxy-spongian diterpene 17             | diterpene | <i>S. tubulifera</i>       | Mexican Caribbean           | no cytotoxicity against A549, A2058, HepG2, MCF7 and MiaPaca-2 cell lines (MTT assay, triplicate); no antibacterial activity against <i>A. baumannii</i> , <i>P. aeruginosa</i> , <i>K. pneumoniae</i> and <i>S. aureus</i>                                                                                                                | [24] |
|    |                                                |           |                            |                             | mitochondrial-mediated neuroprotective properties through direct interaction with cyclophilin D                                                                                                                                                                                                                                            | [25] |
| 58 | 9-nor-3-hydroxyspongia-3,13(16),14-trien-2-one | diterpene | <i>S. tubulifera</i>       | Mexican Caribbean           | no cytotoxicity against A549, A2058, HepG2, MCF7 and MiaPaca-2 cell lines (MTT assay, triplicate); no antibacterial activity against <i>A. baumannii</i> , <i>P. aeruginosa</i>                                                                                                                                                            | [24] |

| No | Name                                                                 | Class     | Species              | Locality                    | Bioassays                                                                                                                                                                                                                                                                                                                                             | Ref  |
|----|----------------------------------------------------------------------|-----------|----------------------|-----------------------------|-------------------------------------------------------------------------------------------------------------------------------------------------------------------------------------------------------------------------------------------------------------------------------------------------------------------------------------------------------|------|
|    |                                                                      |           |                      |                             | <i>sa</i> , <i>K. pneumoniae</i> and <i>S. aureus</i>                                                                                                                                                                                                                                                                                                 | [25] |
|    |                                                                      |           |                      |                             | mitochondrial-mediated neuroprotective properties through direct interaction with cyclophilin D                                                                                                                                                                                                                                                       |      |
| 59 | 3 $\beta$ ,19-dihydroxyspongia-13(16),14-dien-2-one (epispongiadiol) | diterpene | <i>S. tubulifera</i> | Mexican Caribbean           | cytotoxicity against A549, A2058 and HepG2 cell lines (IC <sub>50</sub> = 73.7 $\pm$ 6.3, 53.9 $\pm$ 0.6 and 60.1 $\pm$ 5.0 $\mu$ M, respectively) (MTT assay, triplicate); no antibacterial activity against <i>A. baumannii</i> , <i>P. aeruginosa</i> , <i>K. pneumoniae</i> and <i>S. aureus</i>                                                  | [24] |
|    |                                                                      |           |                      |                             | mitochondrial-mediated neuroprotective properties through direct interaction with cyclophilin D                                                                                                                                                                                                                                                       | [25] |
| 60 | spongian diterpene 17                                                | diterpene | <i>S. tubulifera</i> | Mexican Caribbean           | no cytotoxicity against A549, A2058, HepG2, MCF7 and MiaPaca-2 cell lines (MTT assay, triplicate); no antibacterial activity against <i>A. baumannii</i> , <i>P. aeruginosa</i> , <i>K. pneumoniae</i> and <i>S. aureus</i>                                                                                                                           | [24] |
|    |                                                                      |           |                      |                             | mitochondrial-mediated neuroprotective properties through direct interaction with cyclophilin D                                                                                                                                                                                                                                                       | [25] |
| 61 | ambliol C                                                            | diterpene | <i>S. tubulifera</i> | Mexican Caribbean           | cytotoxicity against A549, A2058, HepG2, MCF7 and MiaPaca-2 cell lines (IC <sub>50</sub> = 28.3 $\pm$ 2.1, 22.9 $\pm$ 0.7, 24.3 $\pm$ 0.2, 19.9 $\pm$ 3.3 and 11.7 $\pm$ 0.9 $\mu$ M, respectively) (MTT assay, triplicate); no antibacterial activity against <i>A. baumannii</i> , <i>P. aeruginosa</i> , <i>K. pneumoniae</i> and <i>S. aureus</i> | [24] |
| 62 | dinorspongian A                                                      | diterpene | <i>Spongia</i> sp.   | Zhanjiang, Guangdong, China | no cytotoxicity against HeLa, Huh7, RBL-2H3 and PC3 cell lines (MTT assay, triplicate)                                                                                                                                                                                                                                                                | [26] |
| 63 | dinorspongian B                                                      | diterpene | <i>Spongia</i> sp.   | Zhanjiang, Guangdong, China | no cytotoxicity against HeLa, Huh7, RBL-2H3 and PC3 cell lines (MTT assay, triplicate)                                                                                                                                                                                                                                                                | [26] |
| 64 | dinorspongian C                                                      | diterpene | <i>Spongia</i> sp.   | Zhanjiang, Guangdong, China | no cytotoxicity against HeLa, Huh7, RBL-2H3 and PC3 cell lines (MTT assay, triplicate)                                                                                                                                                                                                                                                                | [26] |

| No | Name                                                  | Class     | Species            | Locality                    | Bioassays                                                                                                                                                                                                                                                                                      | Ref  |
|----|-------------------------------------------------------|-----------|--------------------|-----------------------------|------------------------------------------------------------------------------------------------------------------------------------------------------------------------------------------------------------------------------------------------------------------------------------------------|------|
| 65 | dinorspongian D                                       | diterpene | <i>Spongia</i> sp. | Zhanjiang, Guangdong, China | no cytotoxicity against HeLa, Huh7, RBL-2H3 and PC3 cell lines (MTT assay, triplicate)                                                                                                                                                                                                         | [26] |
| 66 | dinorspongian E                                       | diterpene | <i>Spongia</i> sp. | Zhanjiang, Guangdong, China | no cytotoxicity against HeLa, Huh7, RBL-2H3 and PC3 cell lines (MTT assay, triplicate)                                                                                                                                                                                                         | [26] |
| 67 | dinorspongian F                                       | diterpene | <i>Spongia</i> sp. | Zhanjiang, Guangdong, China | no cytotoxicity against HeLa, Huh7, RBL-2H3 and PC3 cell lines (MTT assay, triplicate)                                                                                                                                                                                                         | [26] |
| 68 | epoxynorspongian A                                    | diterpene | <i>Spongia</i> sp. | Zhanjiang, Guangdong, China | no cytotoxicity against HeLa, Huh7, RBL-2H3 and PC3 cell lines (MTT assay, triplicate)                                                                                                                                                                                                         | [26] |
| 69 | epoxynorspongian B                                    | diterpene | <i>Spongia</i> sp. | Zhanjiang, Guangdong, China | no cytotoxicity against HeLa, Huh7, RBL-2H3 and PC3 cell lines (MTT assay, triplicate)                                                                                                                                                                                                         | [26] |
| 70 | epoxynorspongian C                                    | diterpene | <i>Spongia</i> sp. | Zhanjiang, Guangdong, China | no cytotoxicity against HeLa, Huh7, RBL-2H3 and PC3 cell lines (MTT assay, triplicate)                                                                                                                                                                                                         | [26] |
| 71 | epoxynorspongian D                                    | diterpene | <i>Spongia</i> sp. | Zhanjiang, Guangdong, China | no cytotoxicity against HeLa, Huh7, RBL-2H3 and PC3 cell lines (MTT assay, triplicate)                                                                                                                                                                                                         | [26] |
| 72 | epoxynorspongian E                                    | diterpene | <i>Spongia</i> sp. | Zhanjiang, Guangdong, China | cytotoxicity against RBL-2H3 and PC3 cell lines ( $IC_{50}$ = 27.2 and 24.8 $\mu$ M, respectively), but no cytotoxicity against HeLa and Huh7 cell lines (MTT assay, triplicate)                                                                                                               | [26] |
| 73 | epoxynorspongian F                                    | diterpene | <i>Spongia</i> sp. | Zhanjiang, Guangdong, China | no cytotoxicity against HeLa, Huh7, RBL-2H3 and PC3 cell lines (MTT assay, triplicate)                                                                                                                                                                                                         | [26] |
| 74 | 17-dehydroxy-sponialactone                            | diterpene | <i>Spongia</i> sp. | Jeddah, Saudi Arabia        | no cytotoxicity against P388, HuCCT, DLD-1 and CCD-966SK cell lines ( $IC_{50}$ > 20 $\mu$ g/mL) (Almar Blue assay, triplicate); anti-inflammatory activity toward inhibiting $O_2^-$ generation and elastase release ( $IC_{50}$ = $3.37 \pm 0.21$ and $4.07 \pm 0.60$ $\mu$ M, respectively) | [27] |
| 75 | 18-nor-3,17-dihydroxy-spongia-3,13(16),14-trien-2-one | diterpene | <i>Spongia</i> sp. | Jeddah, Saudi Arabia        | no cytotoxicity against P388, HuCCT, DLD-1 and CCD-966SK cell lines ( $IC_{50}$ > 20                                                                                                                                                                                                           | [27] |

| No | Name                                                  | Class     | Species               | Locality                                                 | Bioassays                                                                                                                                                                                                                                                                                                                                                                                                     | Ref  |
|----|-------------------------------------------------------|-----------|-----------------------|----------------------------------------------------------|---------------------------------------------------------------------------------------------------------------------------------------------------------------------------------------------------------------------------------------------------------------------------------------------------------------------------------------------------------------------------------------------------------------|------|
|    |                                                       |           |                       |                                                          | µg/mL) (Almar Blue assay, triplicate); no anti-inflammatory activity toward inhibiting O <sub>2</sub> <sup>-</sup> generation and elastase release                                                                                                                                                                                                                                                            |      |
|    |                                                       |           | <i>S. officinalis</i> | Shui Niupo Village, Danzhou City, Hainan Province, China | cytotoxicity activities against K562 cell line (IC <sub>50</sub> = 6.4 µM) (MTT assay, triplicate), but no cytotoxicity against H69AR, ASPC-1 and MDA-MB-231 cell lines (SRB assay, triplicate); signalling inhibition of HIF-1 and Wnt (inhibitory rates 84.7% and 85.2%, respectively), but no signalling inhibition of STAT3/NF-κB, or activation of PPARγ and p53                                         | [28] |
| 76 | 2β,3α,19-Triacetox-17-hydroxyspongia-13(16),14-diene  | diterpene | <i>S. officinalis</i> | Shui Niupo Village, Danzhou City, Hainan Province, China | cytotoxicity activities against K562 cell line (IC <sub>50</sub> = 7.3 µM) (MTT assay, triplicate), but no cytotoxicity against H69AR, ASPC-1 and MDA-MB-231 cell lines (SRB assay, triplicate); no signalling inhibition of HIF-1, Wnt and STAT3/NF-κB, or activation of PPARγ and p53                                                                                                                       | [28] |
| 77 | 18-nor-2,17-hydroxyspongia-1,4,13(16),14-quaien-3-one | diterpene | <i>S. officinalis</i> | Shui Niupo Village, Danzhou City, Hainan Province, China | no cytotoxicity against K562, H69AR, ASPC-1 and MDA-MB-231 cell lines (MTT assay and SRB assay, triplicate); no signalling inhibition of HIF-1, Wnt and STAT3/NF-κB, or activation of PPARγ and p53                                                                                                                                                                                                           | [28] |
| 78 | 3β,17,19-trihydroxyspongia-13(16),14-dien-2-one       | diterpene | <i>S. officinalis</i> | Shui Niupo Village, Danzhou City, Hainan Province, China | cytotoxicity activities against K562 and H69AR cell lines (IC <sub>50</sub> = 3.5 and 9.5 µM, respectively) (MTT assay and SRB assay, triplicate), but no cytotoxicity against ASPC-1 and MDA-MB-231 cell lines (SRB assay, triplicate); signalling inhibition of HIF-1 and Wnt (inhibitory rates 88.5% and 87.9%, respectively), but no signalling inhibition of STAT3/NF-κB, or activation of PPARγ and p53 | [28] |
| 79 | 2,17,19- trihydroxyspongia-1,13(16),14-trien-3-one    | diterpene | <i>S. officinalis</i> | Shui Niupo Village, Danzhou City, Hainan Province, China | no cytotoxicity against K562, H69AR, ASPC-1 and MDA-MB-231 cell lines (MTT                                                                                                                                                                                                                                                                                                                                    | [28] |

| No | Name                                                     | Class     | Species                    | Locality                                                 | Bioassays                                                                                                                                                                                                                                                                                                                                          | Ref  |
|----|----------------------------------------------------------|-----------|----------------------------|----------------------------------------------------------|----------------------------------------------------------------------------------------------------------------------------------------------------------------------------------------------------------------------------------------------------------------------------------------------------------------------------------------------------|------|
|    |                                                          |           |                            |                                                          | assay and SRB assay, triplicate); no signalling inhibition of HIF-1, Wnt and STAT3/NF- $\kappa$ B, or activation of PPAR $\gamma$ and p53                                                                                                                                                                                                          |      |
| 80 | 3 $\alpha$ ,17,19-trihydroxyspongia-13(16),14-dien-2-one | diterpene | <i>S. officinalis</i>      | Shui Niupo Village, Danzhou City, Hainan Province, China | no cytotoxicity against K562, H69AR, ASPC-1 and MDA-MB-231 cell lines (MTT assay and SRB assay, triplicate); no signalling inhibition of HIF-1, Wnt and STAT3/NF- $\kappa$ B, or activation of PPAR $\gamma$ and p53                                                                                                                               | [28] |
| 81 | 3-nor-spongianone B                                      | diterpene | <i>S. officinalis</i>      | Shui Niupo Village, Danzhou City, Hainan Province, China | no cytotoxicity against K562, H69AR, ASPC-1 and MDA-MB-231 cell lines (MTT assay and SRB assay, triplicate); no signalling inhibition of HIF-1, Wnt and STAT3/NF- $\kappa$ B, or activation of PPAR $\gamma$ and p53                                                                                                                               | [28] |
| 82 | jellynolide A                                            | diterpene | <i>S. officinalis</i>      | Shui Niupo Village, Danzhou City, Hainan Province, China | no cytotoxicity against K562, H69AR, ASPC-1 and MDA-MB-231 cell lines (SRB assay and MTT assay, triplicate); no anti-polymerase activity against COVID-19 RNA-dependent RNA polymerase; signalling inhibition of TAT3/NF- $\kappa$ B and HIF-1 (inhibitory rates 67.6% and 71.6% at 20 $\mu$ M, respectively), but no signalling inhibition of Wnt | [29] |
| 83 | dinorsongiapyridine                                      | diterpene | <i>Spongia</i> sp.         | Zhanjiang, Guangdong, China                              | no cytotoxicity against K562, A549, Hela, HT29, SK-BR-3 and Huh7 cell lines (MTT assay, triplicate)                                                                                                                                                                                                                                                | [30] |
| 84 | 19,20-dihydroxyspongia-13(16),14-diene                   | diterpene | <i>Spongia irregularis</i> | Ras Mohamed, Sinai, Egypt                                | no inhibitory against HCV (Molecular docking calculations)                                                                                                                                                                                                                                                                                         | [31] |
| 85 | 3 $\beta$ -acetoxyspongia-13(16),14-diene                | diterpene | <i>S. irregularis</i>      | Ras Mohamed, Sinai, Egypt                                | no inhibitory against HCV (Molecular docking calculations)                                                                                                                                                                                                                                                                                         | [31] |
| 86 | 3 $\alpha$ -acetoxyspongia-13(16),14-diene               | diterpene | <i>S. irregularis</i>      | Ras Mohamed, Sinai, Egypt                                | no inhibitory against HCV (Molecular docking calculations)                                                                                                                                                                                                                                                                                         | [31] |
| 87 | spongianol                                               | diterpene | <i>Spongia</i> sp.         | Jeddah, Saudi Arabia                                     | no cytotoxicity against Huh7 cell line (MTT assay, triplicate); no antibacterial activity against <i>S. aureus</i> ; no an-                                                                                                                                                                                                                        | [15] |

| No | Name                  | Class     | Species            | Locality             | Bioassays                                                                                                                                                                                                                                                                                                                                          | Ref  |
|----|-----------------------|-----------|--------------------|----------------------|----------------------------------------------------------------------------------------------------------------------------------------------------------------------------------------------------------------------------------------------------------------------------------------------------------------------------------------------------|------|
|    |                       |           |                    |                      | ti-inflammatory activity toward inhibiting $O_2^-$ generation and elastase release ( $IC_{50} > 20 \mu M$ )                                                                                                                                                                                                                                        |      |
| 88 | 10-hydroxykahukuene B | diterpene | <i>Spongia</i> sp. | Jeddah,Saudi Arabia  | cytotoxicity against Huh7 cell line (inhibitory rate 17%) (MTT assay, triplicate); no antibacterial activity against <i>S. aureus</i> ; no anti-inflammatory activity toward inhibiting $O_2^-$ generation and elastase release ( $IC_{50} > 20 \mu M$ )                                                                                           | [15] |
| 89 | spongenolactone A     | diterpene | <i>Spongia</i> sp. | Jeddah, Saudi Arabia | no cytotoxic activity against Huh7 cell line (Resazurin assay, triplicate); antibacterial activity against <i>S. aureus</i> (inhibition rate 93% at $200 \mu M$ ); anti-inflammatory activity toward inhibiting superoxide anion ( $O_2^-$ ) generation ( $IC_{50} = 16.5 \pm 1.6 \mu M$ ) and elastase release ( $IC_{50} > 20 \mu M$ )           | [32] |
| 90 | spongenolactone B     | diterpene | <i>Spongia</i> sp. | Jeddah, Saudi Arabia | no cytotoxic activity against Huh7 cell line (Resazurin assay, triplicate); antibacterial activity against <i>S. aureus</i> (inhibition rate 40% at $200 \mu M$ ); anti-inflammatory activity toward inhibiting superoxide anion ( $O_2^-$ ) generation ( $IC_{50} = 13.1 \pm 1.3 \mu M$ ) and elastase release ( $IC_{50} = 18.6 \pm 0.9 \mu M$ ) | [32] |
| 91 | spongenolactone C     | diterpene | <i>Spongia</i> sp. | Jeddah, Saudi Arabia | no cytotoxic activity against Huh7 cell line (Resazurin assay, triplicate); no antibacterial activity against <i>S. aureus</i> ; anti-inflammatory activity toward inhibiting superoxide anion ( $O_2^-$ ) generation ( $IC_{50} = 17.4 \pm 1.9 \mu M$ ) and elastase release ( $IC_{50} > 20 \mu M$ )                                             | [32] |
| 92 | secodinorspongin A    | diterpene | <i>Spongia</i> sp. | Jeddah, Saudi Arabia | no cytotoxic activity against Huh7 cell line (Resazurin assay, triplicate); antibacterial activity against <i>S. aureus</i> (inhibition rate 75% at $200 \mu M$ ); no anti-inflammatory activity toward inhibiting superoxide anion ( $O_2^-$ ) generation ( $IC_{50} > 20 \mu M$ ) and elastase release ( $IC_{50} > 20 \mu M$ )                  | [33] |

| No  | Name                | Class         | Species            | Locality                         | Bioassays                                                                                                                                                                                                                                                                                       | Ref  |
|-----|---------------------|---------------|--------------------|----------------------------------|-------------------------------------------------------------------------------------------------------------------------------------------------------------------------------------------------------------------------------------------------------------------------------------------------|------|
| 93  | secodinorspongin B  | diterpene     | <i>Spongia</i> sp. | Jeddah, Saudi Arabia             | no cytotoxic activity against Huh7 cell line (Resazurin assay, triplicate); no antibacterial activity against <i>S. aureus</i> ; no anti-inflammatory activity toward inhibiting superoxide anion ( $O_2^-$ ) generation ( $IC_{50} > 20 \mu M$ ) and elastase release ( $IC_{50} > 20 \mu M$ ) | [33] |
| 94  | secodinorspongin C  | diterpene     | <i>Spongia</i> sp. | Jeddah, Saudi Arabia             | no cytotoxic activity against Huh7 cell line (Resazurin assay, triplicate); no antibacterial activity against <i>S. aureus</i> ; no anti-inflammatory activity toward inhibiting superoxide anion ( $O_2^-$ ) generation ( $IC_{50} > 20 \mu M$ ) and elastase release ( $IC_{50} > 20 \mu M$ ) | [33] |
| 95  | secodinorspongin D  | diterpene     | <i>Spongia</i> sp. | Jeddah, Saudi Arabia             | no cytotoxic activity against Huh7 cell line (Resazurin assay, triplicate); no antibacterial activity against <i>S. aureus</i> ; anti-inflammatory activity toward inhibiting superoxide anion ( $O_2^-$ ) generation ( $IC_{50} > 20 \mu M$ ) and elastase release ( $IC_{50} > 20 \mu M$ )    | [33] |
| 96  | sponginolide        | diterpene     | <i>Spongia</i> sp. | Jeddah, Saudi Arabia             | no cytotoxic activity against Huh7 cell line (Resazurin assay, triplicate); no antibacterial activity against <i>S. aureus</i> ; anti-inflammatory activity toward inhibiting superoxide anion ( $O_2^-$ ) generation ( $IC_{50} > 20 \mu M$ ) and elastase release ( $IC_{50} > 20 \mu M$ )    | [33] |
| 97  | <sup>2</sup>        | sesterterpene | <i>Spongia</i> sp. | Geoje Island, South Korea        | no antagonistic activity against the farnesoid X-activated receptor (FXR) (Co-transfection assay); no cytotoxicity against CV-1 cell line (MTT assay, triplicate)                                                                                                                               | [34] |
| 98  | /                   | sesterterpene | <i>Spongia</i> sp. | Geoje Island, South Korea        | no antagonistic activity against FXR (Co-transfection assay); no cytotoxicity against CV-1 cell line (MTT assay, triplicate)                                                                                                                                                                    | [34] |
| 99  | scalarolide acetate | sesterterpene | <i>Spongia</i> sp. | Mengalum Island, Sabah, Malaysia | cytotoxic activities against S1T cell line ( $IC_{50} = 5.16 \mu g/mL$ ) (WST-8 assay, triplicate)                                                                                                                                                                                              | [35] |
| 100 | scalarolide         | sesterterpene | <i>Spongia</i> sp. | Mengalum Island, Sabah, Malaysia | cytotoxic activities against S1T cell line                                                                                                                                                                                                                                                      | [35] |

| No  | Name                                                               | Class         | Species              | Locality                         | Bioassays                                                                                                                                                                                                                                                                                                                                                      | Ref  |
|-----|--------------------------------------------------------------------|---------------|----------------------|----------------------------------|----------------------------------------------------------------------------------------------------------------------------------------------------------------------------------------------------------------------------------------------------------------------------------------------------------------------------------------------------------------|------|
|     |                                                                    |               |                      | sia                              | (IC <sub>50</sub> = 3.93 µg/mL) (WST-8 assay, triplicate)                                                                                                                                                                                                                                                                                                      |      |
| 101 | 12- <i>O</i> -deacetyl-12- <i>epi</i> -19- <i>O</i> -methylsclarin | sesterterpene | <i>Spongia</i> sp.   | Mengalum Island, Sabah, Malaysia | c cytotoxic activities against S1T cell line (IC <sub>50</sub> = 2.31 µg/mL) (WST-8 assay, triplicate)                                                                                                                                                                                                                                                         | [35] |
| 102 | 18-hydroxy-19-norscalar-16-en-20-carboxylate                       | sesterterpene | <i>Spongia</i> sp.   | Mengalum Island, Sabah, Malaysia | —                                                                                                                                                                                                                                                                                                                                                              | [35] |
| 103 | scalalactam A                                                      | sesterterpene | <i>Spongia</i> sp.   | Tong-Yong City, Korea            | no antagonistic activity against FXR (Co-transfection assay); no cytotoxicity against CV-1 cell line (MTT assay, triplicate)                                                                                                                                                                                                                                   | [36] |
| 104 | scalalactam B                                                      | sesterterpene | <i>Spongia</i> sp.   | Tong-Yong City, Korea            | no antagonistic activity against FXR (Co-transfection assay); no cytotoxicity against CV-1 cell line (MTT assay, triplicate)                                                                                                                                                                                                                                   | [36] |
| 105 | scalalactam C                                                      | sesterterpene | <i>Spongia</i> sp.   | Tong-Yong City, Korea            | no antagonistic activity against FXR (Co-transfection assay); no cytotoxicity against CV-1 cell line (MTT assay, triplicate)                                                                                                                                                                                                                                   | [36] |
| 106 | scalalactam D                                                      | sesterterpene | <i>Spongia</i> sp.   | Tong-Yong City, Korea            | no antagonistic activity against FXR (Co-transfection assay); no cytotoxicity against CV-1 cell line (MTT assay, triplicate)                                                                                                                                                                                                                                   | [36] |
| 107 | scalarin                                                           | sesterterpene | <i>S. tubulifera</i> | Mexican Caribbean                | no cytotoxicity against A549, A2058, HepG2, MCF7 and MiaPaca-2 cell lines (MTT assay, triplicate); no antibacterial activity against <i>A. baumannii</i> , <i>P. aeruginosa</i> , <i>K. pneumoniae</i> and <i>S. aureus</i> ; no antiviral activity against human adenoviruses HAdV5 and HAdV5-GFP                                                             | [24] |
| 108 | scalimide A                                                        | sesterterpene | <i>Spongia</i> sp.   | Philippines                      | antibacterial activity against <i>Micrococcus luteus</i> , <i>S. aureus</i> and <i>Bacillus subtilis</i> (MIC = 32, 64 and 16 µg/mL, respectively), but no antibacterial activity against <i>Salmonella typhimurium</i> , <i>K. pneumoniae</i> and <i>Escherichia coli</i> (MIC > 128 µg/mL); cytotoxicity against MCF7 cell line (EC <sub>50</sub> = 25.6 µM) | [37] |

| No  | Name        | Class         | Species            | Locality    | Bioassays                                                                                                                                                                                                                                                                                                                                                                               | Ref  |
|-----|-------------|---------------|--------------------|-------------|-----------------------------------------------------------------------------------------------------------------------------------------------------------------------------------------------------------------------------------------------------------------------------------------------------------------------------------------------------------------------------------------|------|
|     |             |               |                    |             | (MTS assay, triplicate)                                                                                                                                                                                                                                                                                                                                                                 |      |
| 109 | scalimide B | sesterterpene | <i>Spongia</i> sp. | Philippines | antibacterial activity against <i>B. subtilis</i> (MIC = 128 µg/mL), but no antibacterial activity against <i>M. luteus</i> , <i>S. aureus</i> , <i>S. typhimurium</i> , <i>K. pneumoniae</i> and <i>E. coli</i> (MIC > 128 µg/mL); cytotoxicity against MCF7 cell line (EC <sub>50</sub> = 73.9 µM) (MTS assay, triplicate)                                                            | [37] |
| 110 | scalimide C | sesterterpene | <i>Spongia</i> sp. | Philippines | antibacterial activity against <i>M. luteus</i> , <i>S. aureus</i> and <i>B. subtilis</i> (MIC = 32, 128 and 4 µg/mL, respectively), but no antibacterial activity against <i>S. typhimurium</i> , <i>K. pneumoniae</i> and <i>E. coli</i> (MIC > 128 µg/mL); cytotoxicity against MCF7 cell line (EC <sub>50</sub> = 16.0 µM) (MTS assay, triplicate)                                  | [37] |
| 111 | scalimide D | sesterterpene | <i>Spongia</i> sp. | Philippines | antibacterial activity against <i>M. luteus</i> , <i>S. aureus</i> and <i>B. subtilis</i> (MIC = 32, 64 and 8 µg/mL, respectively), but no antibacterial activity against <i>S. typhimurium</i> , <i>K. pneumoniae</i> and <i>E. coli</i> (MIC > 128 µg/mL); cytotoxicity against MCF7 cell line (EC <sub>50</sub> = 13.7 µM) (MTS assay, triplicate)                                   | [37] |
| 112 | scalimide E | sesterterpene | <i>Spongia</i> sp. | Philippines | no antibacterial activity against <i>M. luteus</i> , <i>S. aureus</i> , <i>B. subtilis</i> , <i>S. typhimurium</i> , <i>K. pneumoniae</i> and <i>E. coli</i> (MIC > 128 µg/mL); cytotoxicity against MCF7 cell line (EC <sub>50</sub> = 26.5 µM) (MTS assay, triplicate)                                                                                                                | [37] |
| 113 | scalimide F | sesterterpene | <i>Spongia</i> sp. | Philippines | antibacterial activity against <i>Micrococcus luteus</i> , <i>S. aureus</i> and <i>Bacillus subtilis</i> (MIC = 64, 128 and 32 µg/mL, respectively), but no antibacterial activity against <i>Salmonella typhimurium</i> , <i>K. pneumoniae</i> and <i>Escherichia coli</i> (MIC > 128 µg/mL); cytotoxicity against MCF7 cell line (EC <sub>50</sub> = 38.7 µM) (MTS assay, triplicate) | [37] |
| 114 | scalimide G | sesterterpene | <i>Spongia</i> sp. | Philippines | antibacterial activity against <i>M. luteus</i> , <i>S. aureus</i> and <i>B. subtilis</i> (MIC = 32, 128 and 32                                                                                                                                                                                                                                                                         | [37] |

| No  | Name                                                               | Class         | Species                             | Locality                                         | Bioassays                                                                                                                                                                                                                                                                                                                                              | Ref  |
|-----|--------------------------------------------------------------------|---------------|-------------------------------------|--------------------------------------------------|--------------------------------------------------------------------------------------------------------------------------------------------------------------------------------------------------------------------------------------------------------------------------------------------------------------------------------------------------------|------|
|     |                                                                    |               |                                     |                                                  | µg/mL, respectively), but no antibacterial activity against <i>S. typhimurium</i> , <i>K. pneumoniae</i> and <i>E. coli</i> (MIC > 128 µg/mL); cytotoxicity against MCF7 cell line (EC <sub>50</sub> = 31.5 µM) (MTS assay, triplicate)                                                                                                                |      |
| 115 | scalimide H                                                        | sesterterpene | <i>Spongia</i> sp.                  | Philippines                                      | antibacterial activity against <i>M. luteus</i> , <i>S. aureus</i> and <i>B. subtilis</i> (MIC = 32, 128 and 8 µg/mL, respectively), but no antibacterial activity against <i>S. typhimurium</i> , <i>K. pneumoniae</i> and <i>E. coli</i> (MIC > 128 µg/mL); cytotoxicity against MCF7 cell line (EC <sub>50</sub> = 20.7 µM) (MTS assay, triplicate) | [37] |
| 116 | scalimide I                                                        | sesterterpene | <i>Spongia</i> sp.                  | Philippines                                      | no antibacterial activity against <i>M. luteus</i> , <i>S. aureus</i> , <i>B. subtilis</i> , <i>S. typhimurium</i> , <i>K. pneumoniae</i> and <i>E. coli</i> (MIC > 128 µg/mL); cytotoxicity against MCF7 cell line (EC <sub>50</sub> = 42.7 µM) (MTS assay, triplicate)                                                                               | [37] |
| 117 | scalimide J                                                        | sesterterpene | <i>Spongia</i> sp.                  | Philippines                                      | antibacterial activity against <i>M. luteus</i> , <i>S. aureus</i> , <i>B. subtilis</i> , <i>S. typhimurium</i> , <i>K. pneumoniae</i> and <i>E. coli</i> (MIC = 8, 16, 4, 32, 64 and 64 µg/mL, respectively); cytotoxicity against MCF7 cell line (EC <sub>50</sub> = 23.3 µM) (MTS assay, triplicate)                                                | [37] |
| 118 | scalimide K                                                        | sesterterpene | <i>Spongia</i> sp.                  | Philippines                                      | antibacterial activity against <i>M. luteus</i> , <i>S. aureus</i> and <i>B. subtilis</i> (MIC = 16, 32 and 4 µg/mL, respectively), but no antibacterial activity against <i>S. typhimurium</i> , <i>K. pneumoniae</i> and <i>E. coli</i> (MIC > 128 µg/mL); cytotoxicity against MCF7 cell line (EC <sub>50</sub> = 20.6 µM) (MTS assay, triplicate)  | [37] |
| 119 | scalimide L                                                        | sesterterpene | <i>Spongia</i> sp.                  | Philippines                                      | no antibacterial activity against <i>M. luteus</i> , <i>S. aureus</i> , <i>B. subtilis</i> , <i>S. typhimurium</i> , <i>K. pneumoniae</i> and <i>E. coli</i> (MIC > 128 µg/mL); cytotoxicity against MCF7 cell line (EC <sub>50</sub> = 42.9 µM) (MTS assay, triplicate)                                                                               | [37] |
| 120 | 12-deacetoxy-4-demethyl-11,24-diacetoxy-3,4-methylenedioxoscalarin | sesterterpene | <i>Spongia</i> cf. <i>agaricina</i> | Bunaken National Park, North Sulawesi, Indonesia | antibacterial activity against <i>Arthrobacter crystallopoietes</i> and <i>Bacillus megaterium</i>                                                                                                                                                                                                                                                     | [38] |

| No  | Name                                              | Class       | Species                | Locality                                       | Bioassays                                                                                                                                                                                                                                     | Ref  |
|-----|---------------------------------------------------|-------------|------------------------|------------------------------------------------|-----------------------------------------------------------------------------------------------------------------------------------------------------------------------------------------------------------------------------------------------|------|
| 121 | isospongiaquinone                                 | meroterpene | <i>Spongia</i> sp.     | South China Sea                                | phytoregulating activity for agricultural plants: stimulated the root growth of seedlings of buckwheat and barley                                                                                                                             | [39] |
| 122 | ilimaquinone                                      | meroterpene | <i>Spongia</i> sp.     | South China Sea                                | phytoregulating activity for agricultural plants: stimulated the root growth of wheat seedlings                                                                                                                                               | [39] |
|     |                                                   |             |                        | Son Cha, Lang Co, Thua Thien-Hue city, Vietnam | antibacterial activity against <i>B. subtilis</i> and <i>S. aureus</i> (MIC = 6.25 and 6.25 $\mu$ M, respectively), but no antibacterial activity against <i>K. pneumoniae</i> and <i>E. coli</i> (MIC > 100 $\mu$ M) (MTT assay, triplicate) | [42] |
|     |                                                   |             |                        |                                                | cytotoxicity against A549, MCF7, HeLa and WI-38 cell lines (IC <sub>50</sub> = 5.9, 8.3, 7.6 and 9.7 $\mu$ M, respectively)                                                                                                                   | [43] |
| 123 | smenoquinone                                      | meroterpene | <i>Spongia</i> sp.     | South China Sea                                | no activity on the root growth of the seedlings of plants buckwheat, wheat, soy, and barley                                                                                                                                                   | [39] |
| 124 | 18-deoxy-18-formamidodictyoceratin B              | meroterpene | <i>Spongia pertusa</i> | Yongxing Island, China                         | no cytotoxicity against U937, A549, HeLa and HepG2 cell lines (CCK-8 assay, triplicate); no CDK-2 affinity (SPR assay)                                                                                                                        | [40] |
|     |                                                   |             |                        |                                                | no antifungal activity against <i>Trichophyton rubrum</i> , <i>Trichophyton mentagrophytes</i> and <i>Candida albicans</i> (Dilution assay)                                                                                                   | [47] |
| 125 | 18-deoxy-18-(2-hydroxyacetyl)aminodictyoceratin B | meroterpene | <i>S. pertusa</i>      | Yongxing Island, China                         | no cytotoxicity against U937, A549, HeLa and HepG2 cell lines (CCK-8 assay, triplicate); no CDK-2 affinity (SPR assay)                                                                                                                        | [40] |
|     |                                                   |             |                        |                                                | no antifungal activity against <i>T. rubrum</i> , <i>T. mentagrophytes</i> and <i>C. albicans</i> (Dilution assay)                                                                                                                            | [47] |
| 126 | dictyoceratin D                                   | meroterpene | <i>S. pertusa</i>      | Yongxing Island, China                         | no cytotoxicity against U937, A549, HeLa and HepG2 cell lines (CCK-8 assay, triplicate); no CDK-2 affinity (SPR assay)                                                                                                                        | [40] |
| 127 | N-methyl-ent-smenospongine                        | meroterpene | <i>S. pertusa</i>      | Yongxing Island, China                         | no cytotoxicity against U937, A549, HeLa and HepG2 cell lines (CCK-8 assay, triplicate); no CDK-2 affinity (SPR assay)                                                                                                                        | [40] |
| 128 | N-methyl-5-epi-smenospongine                      | meroterpene | <i>S. pertusa</i>      | Yongxing Island, China                         | no cytotoxicity against U937, A549, HeLa and HepG2 cell lines (CCK-8 assay, trip-                                                                                                                                                             | [40] |

| No  | Name                                               | Class       | Species            | Locality                                       | Bioassays                                                                                                                                                                                                                            | Ref  |
|-----|----------------------------------------------------|-------------|--------------------|------------------------------------------------|--------------------------------------------------------------------------------------------------------------------------------------------------------------------------------------------------------------------------------------|------|
|     |                                                    |             |                    |                                                | licate); no CDK-2 affinity (SPR assay)                                                                                                                                                                                               |      |
| 129 | 20-demethoxy-20-methylaminodactyloquinone D        | meroterpene | <i>S. pertusa</i>  | Yongxing Island, China                         | no cytotoxicity against U937, A549, HeLa and HepG2 cell lines (CCK-8 assay, triplicate); CDK-2 affinity ( $K_d = 4.8 \mu\text{M}$ ) (SPR assay)                                                                                      | [40] |
| 130 | 20-demethoxy-20-methylamino-5-epi-dactyloquinone D | meroterpene | <i>S. pertusa</i>  | Yongxing Island, China                         | no cytotoxicity against U937, A549, HeLa and HepG2 cell lines (CCK-8 assay, triplicate); no CDK-2 affinity (SPR assay)                                                                                                               | [40] |
| 131 | 20-demethoxy-20-ethoxydactyloquinone E             | meroterpene | <i>S. pertusa</i>  | Yongxing Island, China                         | n no cytotoxicity against U937, A549, HeLa and HepG2 cell lines (CCK-8 assay, triplicate); no CDK-2 affinity (SPR assay)                                                                                                             | [40] |
| 132 | 20-demethoxy-20-ethoxydactyloquinone B             | meroterpene | <i>S. pertusa</i>  | Yongxing Island, China                         | no cytotoxicity against U937, A549, HeLa and HepG2 cell lines (CCK-8 assay, triplicate); no CDK-2 affinity (SPR assay)                                                                                                               | [40] |
| 133 | 20-demethoxy-20-methylaminodactyloquinone B        | meroterpene | <i>S. pertusa</i>  | Yongxing Island, China                         | no cytotoxicity against U937, A549, HeLa and HepG2 cell lines (CCK-8 assay, triplicate); no CDK-2 affinity (SPR assay)                                                                                                               | [40] |
| 134 | 20-demethoxy-20-ethoxycyclospongiaquinone-1        | meroterpene | <i>S. pertusa</i>  | Yongxing Island, China                         | no cytotoxicity against U937, A549, HeLa and HepG2 cell lines (CCK-8 assay, triplicate); no CDK-2 affinity (SPR assay)                                                                                                               | [40] |
| 135 | yahazunol B                                        | meroterpene | <i>S. pertusa</i>  | Yongxing Island, China                         | no cytotoxicity against U937, A549, HeLa and HepG2 cell lines (CCK-8 assay, triplicate); no CDK-2 affinity (SPR assay)                                                                                                               | [40] |
| 136 | 5-epi-Smenospongine                                | meroterpene | <i>S. pertusa</i>  | Yongxing Island, China                         | cytotoxicity against U937 cell line ( $\text{IC}_{50} = 2.8, 1.5, \text{ and } 0.6 \mu\text{M}$ ), but no cytotoxicity against A549, HeLa and HepG2 cell lines (CCK-8 assay, triplicate); no CDK-2 affinity (SPR assay)              | [40] |
| 137 | smenospongine                                      | meroterpene | <i>S. pertusa</i>  | Yongxing Island, China                         | cytotoxicity against U937, HeLa and HepG2 cell lines ( $\text{IC}_{50} = 1.5, 8.6 \text{ and } 6.7 \mu\text{M}$ , respectively), but no cytotoxicity against A549 cell line (CCK-8 assay, triplicate); no CDK-2 affinity (SPR assay) | [40] |
|     |                                                    |             |                    |                                                | preferentially eliminates breast cancer stem-like cells via p38/AMPK $\alpha$ pathways                                                                                                                                               | [41] |
|     |                                                    |             | <i>Spongia</i> sp. | Son Cha, Lang Co, Thua Thien-Hue city, Vietnam | antibacterial activity against <i>B. subtilis</i> and <i>S. aureus</i> (MIC = 12.5 and 6.25 $\mu\text{M}$ , respec-                                                                                                                  | [42] |

| No  | Name            | Class       | Species            | Locality                                       | Bioassays                                                                                                                                                                                                                                     | Ref  |
|-----|-----------------|-------------|--------------------|------------------------------------------------|-----------------------------------------------------------------------------------------------------------------------------------------------------------------------------------------------------------------------------------------------|------|
|     |                 |             |                    |                                                | tively), but no antibacterial activity against <i>K. pneumoniae</i> and <i>E. coli</i> (MIC > 100 $\mu$ M) (MTT assay, triplicate)                                                                                                            |      |
|     |                 |             |                    |                                                | cytotoxicity against A549, MCF7, HeLa and WI-38 cell lines (IC <sub>50</sub> = 7.8, 8.3, 7.5 and 9.2 $\mu$ M, respectively)                                                                                                                   | [43] |
| 138 | smenospongidine | meroterpene | <i>S. pertusa</i>  | Yongxing Island, China                         | cytotoxicity against U937, HeLa and HepG2 cell lines (IC <sub>50</sub> = 0.60, 5.4 and 3.5 $\mu$ M, respectively), but no cytotoxicity against A549 cell line (CKK-8 assay, triplicate); no CDK-2 affinity (SPR assay)                        | [40] |
|     |                 |             |                    |                                                | no antifungal activity against <i>T. rubrum</i> , <i>T. mentagrophytes</i> and <i>C. albicans</i> (Dilution assay)                                                                                                                            | [47] |
|     |                 |             | <i>Spongia</i> sp. | Son Cha, Lang Co, Thua Thien-Hue city, Vietnam | antibacterial activity against <i>B. subtilis</i> and <i>S. aureus</i> (MIC = 12.5 and 12.5 $\mu$ M, respectively), but no antibacterial activity against <i>K. pneumoniae</i> and <i>E. coli</i> (MIC > 100 $\mu$ M) (MTT assay, triplicate) | [42] |
|     |                 |             |                    |                                                | cytotoxicity against A549, MCF7, HeLa and WI-38 cell lines (IC <sub>50</sub> = 4.0, 6.5, 5.0 and 3.0 $\mu$ M, respectively)                                                                                                                   | [43] |
| 139 | langcoquinone A | meroterpene | <i>Spongia</i> sp. | Son Cha, Lang Co, Thua Thien-Hue city, Vietnam | antibacterial activity against <i>B. subtilis</i> and <i>S. aureus</i> (MIC = 12.5 and 12.5 $\mu$ M, respectively), but no antibacterial activity against <i>K. pneumoniae</i> and <i>E. coli</i> (MIC > 100 $\mu$ M) (MTT assay, triplicate) | [42] |
|     |                 |             |                    |                                                | cytotoxicity against A549, MCF7, HeLa and WI-38 cell lines (IC <sub>50</sub> = 9.9, 7.9, 8.1 and 8.4 $\mu$ M, respectively)                                                                                                                   | [43] |
| 140 | langcoquinone B | meroterpene | <i>Spongia</i> sp. | Son Cha, Lang Co, Thua Thien-Hue city, Vietnam | antibacterial activity against <i>B. subtilis</i> and <i>S. aureus</i> (MIC = 12.5 and 12.5 $\mu$ M, respectively), but no antibacterial activity against <i>K. pneumoniae</i> and <i>E. coli</i> (MIC > 100 $\mu$ M) (MTT assay, triplicate) | [42] |
|     |                 |             |                    |                                                | cytotoxicity against A549, MCF7, HeLa and WI-38 cell lines (IC <sub>50</sub> = 6.2, 8.7, 8.0 and                                                                                                                                              | [43] |

| No  | Name                         | Class       | Species            | Locality                                       | Bioassays                                                                                                                                                                                                                                     | Ref  |
|-----|------------------------------|-------------|--------------------|------------------------------------------------|-----------------------------------------------------------------------------------------------------------------------------------------------------------------------------------------------------------------------------------------------|------|
|     |                              |             |                    |                                                | 8.8 $\mu$ M, respectively)                                                                                                                                                                                                                    |      |
| 141 | dictyoceratin A              | meroterpene | <i>Spongia</i> sp. | Son Cha, Lang Co, Thua Thien-Hue city, Vietnam | antibacterial activity against <i>B. subtilis</i> and <i>S. aureus</i> (MIC = 6.25 and 6.25 $\mu$ M, respectively), but no antibacterial activity against <i>K. pneumoniae</i> and <i>E. coli</i> (MIC > 100 $\mu$ M) (MTT assay, triplicate) | [42] |
|     |                              |             |                    |                                                | no cytotoxicity against A549, MCF7, HeLa and WI-38 cell lines (IC <sub>50</sub> > 50 $\mu$ M)                                                                                                                                                 | [43] |
|     |                              |             | <i>Spongia</i> sp. | Xisha Islands, China                           | no antifungal activity against <i>T. rubrum</i> , <i>T. mentagrophytes</i> and <i>C. albicans</i> (Dilution assay)                                                                                                                            | [44] |
| 142 | polyfibrospongol B           | meroterpene | <i>Spongia</i> sp. | Son Cha, Lang Co, Thua Thien-Hue city, Vietnam | no antibacterial activity against <i>B. subtilis</i> , <i>S. aureus</i> , <i>K. pneumoniae</i> and <i>E. coli</i> (MIC > 100 $\mu$ M) (MTT assay, triplicate)                                                                                 | [42] |
|     |                              |             |                    |                                                | cytotoxicity against MCF7 cell line (IC <sub>50</sub> = 42.6 $\mu$ M), but no cytotoxicity against A549, HeLa and WI-38 cell lines (IC <sub>50</sub> > 50 $\mu$ M)                                                                            | [43] |
| 143 | 19-hydroxypolyfibrospongol B | meroterpene | <i>Spongia</i> sp. | Son Cha, Lang Co, Thua Thien-Hue city, Vietnam | no antibacterial activity against <i>B. subtilis</i> , <i>S. aureus</i> , <i>K. pneumoniae</i> and <i>E. coli</i> (MIC > 100 $\mu$ M) (MTT assay, triplicate)                                                                                 | [42] |
|     |                              |             |                    |                                                | cytotoxicity against WI-38 cell line (IC <sub>50</sub> = 42.1 $\mu$ M), but no cytotoxicity against A549, HeLa and MCF7 cell lines (IC <sub>50</sub> > 50 $\mu$ M)                                                                            | [43] |
| 144 | nakijiquinone L              | meroterpene | <i>Spongia</i> sp. | Son Cha, Lang Co, Thua Thien-Hue city, Vietnam | antibacterial activity against <i>B. subtilis</i> and <i>S. aureus</i> (MIC = 6.25 and 6.25 $\mu$ M, respectively), but no antibacterial activity against <i>K. pneumoniae</i> and <i>E. coli</i> (MIC > 100 $\mu$ M) (MTT assay, triplicate) | [42] |
|     |                              |             | <i>S. pertusa</i>  | Yongxing Island, China                         | antifungal activity against <i>T. rubrum</i> , <i>T. mentagrophytes</i> and <i>C. albicans</i> (MIC <sub>50</sub> = 25, 25 and 25 $\mu$ g/mL, respectively) (Dilution assay)                                                                  | [47] |
| 145 | langconol A                  | meroterpene | <i>Spongia</i> sp. | Son Cha, Lang Co, Thua Thien-Hue city, Vietnam | antibacterial activity against <i>B. subtilis</i> (MIC = 12.50 $\mu$ M), but no antibacterial activity against <i>S. aureus</i> , <i>K. pneumoniae</i>                                                                                        | [43] |

| No  | Name               | Class       | Species            | Locality                                       | Bioassays                                                                                                                                                                                                                                                                                                                                                                            | Ref  |
|-----|--------------------|-------------|--------------------|------------------------------------------------|--------------------------------------------------------------------------------------------------------------------------------------------------------------------------------------------------------------------------------------------------------------------------------------------------------------------------------------------------------------------------------------|------|
|     |                    |             |                    |                                                | and <i>E. coli</i> (MIC > 100 $\mu$ M) (MTT assay, triplicate); no cytotoxicity against A549, MCF7, HeLa and WI-38 cell lines (IC <sub>50</sub> > 50 $\mu$ M)                                                                                                                                                                                                                        |      |
| 146 | langconol B        | meroterpene | <i>Spongia</i> sp. | Son Cha, Lang Co, Thua Thien-Hue city, Vietnam | no antibacterial activity against <i>B. subtilis</i> , <i>S. aureus</i> , <i>K. pneumoniae</i> and <i>E. coli</i> (MIC > 100 $\mu$ M) (MTT assay, triplicate); no cytotoxicity against A549, MCF7, HeLa and WI-38 cell lines (IC <sub>50</sub> > 50 $\mu$ M)                                                                                                                         | [43] |
| 147 | langconol C        | meroterpene | <i>Spongia</i> sp. | Son Cha, Lang Co, Thua Thien-Hue city, Vietnam | antibacterial activity against <i>B. subtilis</i> (MIC = 25.0 $\mu$ M), but no antibacterial activity against <i>S. aureus</i> , <i>K. pneumoniae</i> and <i>E. coli</i> (MIC > 100 $\mu$ M) (MTT assay, triplicate); cytotoxicity against A549, MCF7, HeLa and WI-38 cell lines (IC <sub>50</sub> = 7.8, 5.0, 7.2 and 8.7 $\mu$ M, respectively)                                    | [43] |
| 148 | langcoquinone C    | meroterpene | <i>Spongia</i> sp. | Son Cha, Lang Co, Thua Thien-Hue city, Vietnam | antibacterial activity against <i>B. subtilis</i> and <i>S. aureus</i> (MIC = 6.25 and 12.50 $\mu$ M, respectively), but no antibacterial activity against <i>K. pneumoniae</i> and <i>E. coli</i> (MIC > 100 $\mu$ M) (MTT assay, triplicate); cytotoxicity against A549, MCF7, HeLa and WI-38 cell lines (IC <sub>50</sub> = 6.6, 9.6, 7.6 and 8.2 $\mu$ M, respectively)          | [43] |
| 149 | polyfibrospingol A | meroterpene | <i>Spongia</i> sp. | Son Cha, Lang Co, Thua Thien-Hue city, Vietnam | no antibacterial activity against <i>B. subtilis</i> , <i>S. aureus</i> , <i>K. pneumoniae</i> and <i>E. coli</i> (MIC > 100 $\mu$ M) (MTT assay, triplicate); no cytotoxicity against A549, MCF7, HeLa and WI-38 cell lines (IC <sub>50</sub> > 50 $\mu$ M)                                                                                                                         | [43] |
| 150 | smenospongorine    | meroterpene | <i>Spongia</i> sp. | Son Cha, Lang Co, Thua Thien-Hue city, Vietnam | antibacterial activity against <i>B. subtilis</i> and <i>S. aureus</i> (MIC = 12.50 and 25.00 $\mu$ M, respectively), but no antibacterial activity against <i>K. pneumoniae</i> and <i>E. coli</i> (MIC > 100 $\mu$ M) (MTT assay, triplicate); cytotoxic activities against A549, MCF7, HeLa and WI-38 cell lines (IC <sub>50</sub> = 6.7, 4.6, 7.6 and 3.5 $\mu$ M, respectively) | [43] |

| No  | Name                                                  | Class       | Species            | Locality                                       | Bioassays                                                                                                                                                                                                                                                                                                                                                   | Ref  |
|-----|-------------------------------------------------------|-------------|--------------------|------------------------------------------------|-------------------------------------------------------------------------------------------------------------------------------------------------------------------------------------------------------------------------------------------------------------------------------------------------------------------------------------------------------------|------|
|     |                                                       |             |                    | Xisha Islands, China                           | antifungal activity against <i>C. albicans</i> (MIC <sub>50</sub> = 25 µg/mL), but no antifungal activity against <i>T. rubrum</i> and <i>T. mentagrophytes</i> (Dilution assay)                                                                                                                                                                            | [44] |
|     |                                                       |             | <i>S. pertusa</i>  | Yongxing Island, China                         | antifungal activity against <i>T. rubrum</i> , <i>T. mentagrophytes</i> and <i>C. albicans</i> (MIC <sub>50</sub> = 100, 50 and 25 µg/mL, respectively) (Dilution assay)                                                                                                                                                                                    | [47] |
| 151 | smenodiol                                             | meroterpene | <i>Spongia</i> sp. | Xisha Islands, China                           | no antifungal activity against <i>T. rubrum</i> , <i>T. mentagrophytes</i> and <i>C. albicans</i> (Dilution assay)                                                                                                                                                                                                                                          | [44] |
| 152 | 5- <i>epi</i> -smenospongiorine                       | meroterpene | <i>Spongia</i> sp. | Xisha Islands, China                           | antibacterial activity against <i>T. mentagrophytes</i> and <i>T. rubrum</i> (MIC <sub>80</sub> = 12.5 and 12.5 µg/mL, respectively), but no antifungal activity against <i>C. albicans</i> (Dilution assay)                                                                                                                                                | [44] |
|     |                                                       |             | <i>S. pertusa</i>  | Yongxing Island, China                         | antifungal activity against <i>T. rubrum</i> , <i>T. mentagrophytes</i> and <i>C. albicans</i> (MIC <sub>50</sub> = 12.5, 12.5 and 50 µg/mL, respectively) (Dilution assay)                                                                                                                                                                                 | [47] |
| 153 | dictyoceratin C                                       | meroterpene | <i>Spongia</i> sp. | Xisha Islands, China                           | no antifungal activity against <i>T. rubrum</i> , <i>T. mentagrophytes</i> and <i>C. albicans</i> (Dilution assay)                                                                                                                                                                                                                                          | [44] |
| 154 | <i>epi</i> -smenospongidine                           | meroterpene | <i>Spongia</i> sp. | Xisha Islands, China                           | antibacterial activity against <i>T. mentagrophytes</i> and <i>T. rubrum</i> (MIC <sub>80</sub> = 25 and 12.5 µg/mL, respectively), but no antifungal activity against <i>C. albicans</i> (Dilution assay)                                                                                                                                                  | [44] |
| 155 | langcoquinone D<br>(24-methylsulfinyllanchoquinone B) | meroterpene | <i>Spongia</i> sp. | Son Cha, Lang Co, Thua Thien-Hue city, Vietnam | antibacterial activity against <i>B. subtilis</i> and <i>S. aureus</i> (MIC = 12.5 and 25.0 µM, respectively), but no antibacterial activity against <i>K. pneumoniae</i> and <i>E. coli</i> (MIC > 100 µM) (MTT assay, triplicate); cytotoxicity against A549, MCF7, HeLa and WI-38 cell lines (IC <sub>50</sub> = 8.9, 5.9, 8.6 and 5.6 µM, respectively) | [45] |
|     |                                                       |             | <i>S. pertusa</i>  | Yongxing Island, China                         | antifungal activity against <i>T. rubrum</i> , <i>T. mentagrophytes</i> and <i>C. albicans</i> (MIC <sub>50</sub> = 25,                                                                                                                                                                                                                                     | [47] |

| No  | Name                                      | Class       | Species               | Locality                                       | Bioassays                                                                                                                                                                                                                                                | Ref  |
|-----|-------------------------------------------|-------------|-----------------------|------------------------------------------------|----------------------------------------------------------------------------------------------------------------------------------------------------------------------------------------------------------------------------------------------------------|------|
|     |                                           |             |                       |                                                | 12.5 and 25 µg/mL, respectively) (Dilution assay)                                                                                                                                                                                                        |      |
| 156 | langcoquinone E                           | meroterpene | <i>Spongia</i> sp.    | Son Cha, Lang Co, Thua Thien-Hue city, Vietnam | no antibacterial activity against <i>B. subtilis</i> , <i>S. aureus</i> , <i>K. pneumoniae</i> and <i>E. coli</i> (MIC > 100 µM) (MTT assay, triplicate); no cytotoxic activity against A549, MCF7, HeLa and WI-38 cell lines (IC <sub>50</sub> > 50 µM) | [45] |
| 157 | langcoquinone F                           | meroterpene | <i>Spongia</i> sp.    | Son Cha, Lang Co, Thua Thien-Hue city, Vietnam | no antibacterial activity against <i>B. subtilis</i> , <i>S. aureus</i> , <i>K. pneumoniae</i> and <i>E. coli</i> (MIC > 100 µM) (MTT assay, triplicate); no cytotoxic activity against A549, MCF7, HeLa and WI-38 cell lines (IC <sub>50</sub> > 50 µM) | [45] |
| 158 | nakijiquinone E                           | meroterpene | <i>S. irregularis</i> | Ras Mohamed, Sinai, Egypt                      | no inhibitory against HCV (Molecular docking calculations)                                                                                                                                                                                               | [31] |
| 159 | nakijiquinone F                           | meroterpene | <i>S. irregularis</i> | Ras Mohamed, Sinai, Egypt                      | inhibitory against HCV in binding affinity to the active site of NS5B HCV RNA-dependent RNA polymerase (Molecular docking calculations)                                                                                                                  | [31] |
| 160 | 5- <i>epi</i> -isospongiaquinone          | meroterpene | <i>S. irregularis</i> | Ras Mohamed, Sinai, Egypt                      | no inhibitory against HCV (Molecular docking calculations)                                                                                                                                                                                               | [31] |
| 161 | 1,4,44-trihydroxy-2-octaprenylbenzene     | meroterpene | <i>S. irregularis</i> | Ras Mohamed, Sinai, Egypt                      | no inhibitory against HCV (Molecular docking calculations)                                                                                                                                                                                               | [31] |
| 162 | 2-hexaprenyl-1-4-hydroquinone             | meroterpene | <i>Spongia</i> sp.    | Aegean Sea                                     | cytotoxicity against AGS cell line (IC <sub>50</sub> = 5.33 µM) but no cytotoxicity against T24 cell line (MTT assay, triplicate)                                                                                                                        | [46] |
| 163 | 2-heptaprenyl-1-4-hydroquinone            | meroterpene | <i>Spongia</i> sp.    | Aegean Sea                                     | cytotoxicity against AGS (IC <sub>50</sub> = 0.994 µM) and T24 (inhibition rate 66.63% at 100 µM) cell lines (MTT assay, triplicate)                                                                                                                     | [46] |
| 164 | 2-octaprenyl-1-4-hydroquinone             | meroterpene | <i>Spongia</i> sp.    | Aegean Sea                                     | cytotoxicity against AGS and T24 (inhibition rate 33.41% and 34.38% at 100 µM, respectively) cell lines (MTT assay, triplicate)                                                                                                                          | [46] |
| 165 | 2-[24-hydroxy]octaprenyl-1-4-hydroquinone | meroterpene | <i>Spongia</i> sp.    | Aegean Sea                                     | cytotoxicity against AGS cell line (IC <sub>50</sub> = 8.09 µM) but no cytotoxicity against T24 cell line (MTT assay, triplicate)                                                                                                                        | [46] |
| 166 | 2-hexaprenylmethyl-2-methylchromen-6-     | meroterpene | <i>Spongia</i> sp.    | Aegean Sea                                     | no cytotoxicity against AGS and T24 cell                                                                                                                                                                                                                 | [46] |

| No  | Name                    | Class                  | Species               | Locality                 | Bioassays                                                                                                                                                                    | Ref  |
|-----|-------------------------|------------------------|-----------------------|--------------------------|------------------------------------------------------------------------------------------------------------------------------------------------------------------------------|------|
|     | ol                      |                        |                       |                          | lines (MTT assay, triplicate)                                                                                                                                                |      |
| 167 | pelorol A               | meroterpene            | <i>S. pertusa</i>     | Yongxing Island, China   | no antifungal activity against <i>T. rubrum</i> , <i>T. mentagrophytes</i> and <i>C. albicans</i> (Dilution assay)                                                           | [47] |
| 168 | <i>epi</i> -langconol A | meroterpene            | <i>S. pertusa</i>     | Yongxing Island, China   | no antifungal activity against <i>T. rubrum</i> , <i>T. mentagrophytes</i> and <i>C. albicans</i> (Dilution assay)                                                           | [47] |
| 169 | smenospongiic acid      | meroterpene            | <i>S. pertusa</i>     | Yongxing Island, China   | no antifungal activity against <i>T. rubrum</i> , <i>T. mentagrophytes</i> and <i>C. albicans</i> (Dilution assay)                                                           | [47] |
| 170 | smenospongiarine        | meroterpene            | <i>S. pertusa</i>     | Yongxing Island, China   | antifungal activity against <i>T. rubrum</i> , <i>T. mentagrophytes</i> and <i>C. albicans</i> (MIC <sub>50</sub> = 25, 12.5 and 50 µg/mL, respectively) (Dilution assay)    | [47] |
| 171 | metachromin X           | meroterpene            | <i>Spongia</i> sp.    | Miyako-Sone, Japan       | cytotoxicity against HeLa cell line (IC <sub>50</sub> = 64 µM) (MTT assay, triplicate); arrest effects on the cell cycle progression of HeLa/Fucci2 cells at S/G2/M phase    | [48] |
| 172 | metachromin Y           | meroterpene            | <i>Spongia</i> sp.    | Miyako-Sone, Japan       | cytotoxicity against HeLa cell line (IC <sub>50</sub> = 76 µM) (MTT assay, triplicate); no arrest effects on the cell cycle progression of HeLa/Fucci2 cells at S/G2/M phase | [48] |
| 173 | metachromin C           | meroterpene            | <i>Spongia</i> sp.    | Miyako-Sone, Japan       | cytotoxicity against HeLa cell line (IC <sub>50</sub> = 53 µM) (MTT assay, triplicate); arrest effects on the cell cycle progression of HeLa/Fucci2 cells at S/G2/M phase    | [48] |
| 174 | metachromin J           | meroterpene            | <i>Spongia</i> sp.    | Miyako-Sone, Japan       | cytotoxicity against HeLa cell line (IC <sub>50</sub> = 73 µM) (MTT assay, triplicate); no arrest effects on the cell cycle progression of HeLa/Fucci2 cells at S/G2/M phase | [48] |
| 175 | metachromin T           | meroterpene            | <i>Spongia</i> sp.    | Miyako-Sone, Japan       | cytotoxicity against HeLa cell line (IC <sub>50</sub> = 89 µM) (MTT assay, triplicate); no arrest effects on the cell cycle progression of HeLa/Fucci2 cells at S/G2/M phase | [48] |
| 176 | demethylfurospongins-4  | linear furanoterpenoid | <i>S. officinalis</i> | Cortiou and Riou, France | —                                                                                                                                                                            | [49] |
| 177 | furofficin              | linear furanoterpenoid | <i>S. officinalis</i> | Cortiou and Riou, France | —                                                                                                                                                                            | [49] |
| 178 | furospongins-1          | linear furanoterpenoid | <i>S. officinalis</i> | Cortiou and Riou, France | —                                                                                                                                                                            | [49] |

| No  | Name                           | Class                  | Species               | Locality                                                 | Bioassays                                                                                                                                                                                                                                                                | Ref  |
|-----|--------------------------------|------------------------|-----------------------|----------------------------------------------------------|--------------------------------------------------------------------------------------------------------------------------------------------------------------------------------------------------------------------------------------------------------------------------|------|
|     |                                |                        | <i>Spongia</i> sp.    | North Sulawesi, Indonesia                                | inhibitory against PTP1B, TCPTP and VHR (IC <sub>50</sub> = 9.9, 9.6 and 11 µM, respectively), but no inhibitory against CD45 (IC <sub>50</sub> >30 µM); no cytotoxicity against Huh-7 and EJ-1 cell lines (WST-1 assay, triplicate)                                     | [50] |
| 179 | spongialactam A                | linear furanoterpenoid | <i>S. officinalis</i> | Cortiou and Riou, France                                 | —                                                                                                                                                                                                                                                                        | [49] |
| 180 | spongialactam B                | linear furanoterpenoid | <i>S. officinalis</i> | Cortiou and Riou, France                                 | —                                                                                                                                                                                                                                                                        | [49] |
| 181 | (-)-untenospongins B           | linear furanoterpenoid | <i>S. officinalis</i> | Weizhou Island, China                                    | —                                                                                                                                                                                                                                                                        | [51] |
| 182 | kurospongins                   | linear furanoterpenoid | <i>S. officinalis</i> | Weizhou Island, China                                    | —                                                                                                                                                                                                                                                                        | [51] |
| 183 | fasciculatin acid              | linear furanoterpenoid | <i>S. officinalis</i> | Weizhou Island, China                                    | —                                                                                                                                                                                                                                                                        | [51] |
| 184 | fasciculation                  | linear furanoterpenoid | <i>S. officinalis</i> | Weizhou Island, China                                    | —                                                                                                                                                                                                                                                                        | [51] |
| 185 | sponalisolide A                | linear furanoterpenoid | <i>S. officinalis</i> | Weizhou Island, China                                    | quorum sensing inhibitory activity against <i>Pseudomonas aeruginosa</i>                                                                                                                                                                                                 | [52] |
| 186 | sponalisolide B                | linear furanoterpenoid | <i>S. officinalis</i> | Weizhou Island, China                                    | quorum sensing inhibitory activity against <i>P. aeruginosa</i>                                                                                                                                                                                                          | [52] |
| 187 | spongiafuranic acid A          | linear furanoterpenoid | <i>Spongia</i> sp.    | Jeddah, Saudi Arabia                                     | no cytotoxicity against P388, HuCCT, DLD-1 and CCD-966SK cell lines (IC <sub>50</sub> > 20 µg/mL) (Almar Blue assay, triplicate); no anti-inflammatory activity toward inhibiting O <sub>2</sub> <sup>-</sup> generation and elastase release (IC <sub>50</sub> > 10 µM) | [27] |
|     |                                |                        | <i>S. officinalis</i> | Shui Niupo Village, Danzhou City, Hainan Province, China | no cytotoxicity against K562, H69AR, ASPC-1 and MDA-MB-231 cell lines (SRB assay and MTT assay, triplicate); no signalling inhibition of TAT3/NF-κB, HIF-1 and Wnt                                                                                                       | [29] |
| 188 | spongiafuranohydroxamic acid A | linear furanoterpenoid | <i>Spongia</i> sp.    | Jeddah, Saudi Arabia                                     | no cytotoxicity against P388, HuCCT, DLD-1 and CCD-966SK cell lines (IC <sub>50</sub> > 20 µg/mL) (Almar Blue assay, triplicate); no anti-inflammatory activity toward inhibiting O <sub>2</sub> <sup>-</sup> generation and elastase release (IC <sub>50</sub> > 10 µM) | [27] |
| 189 | 16- <i>epi</i> -irciformonin G | linear furanoterpenoid | <i>Spongia</i> sp.    | Jeddah, Saudi Arabia                                     | no cytotoxicity against P388, HuCCT, DLD-1 and CCD-966SK cell lines (IC <sub>50</sub> > 20 µg/mL) (Almar Blue assay, triplicate); no anti-inflammatory activity toward inhib-                                                                                            | [27] |

| No  | Name                 | Class                  | Species               | Locality                                                 | Bioassays                                                                                                                                                                                                                                                                                            | Ref  |
|-----|----------------------|------------------------|-----------------------|----------------------------------------------------------|------------------------------------------------------------------------------------------------------------------------------------------------------------------------------------------------------------------------------------------------------------------------------------------------------|------|
|     |                      |                        |                       |                                                          | iting O <sub>2</sub> <sup>-</sup> generation and elastase release (IC <sub>50</sub> > 10 µM)                                                                                                                                                                                                         |      |
| 190 | (±)-sponalisolide B  | linear furanoterpenoid | <i>Spongia</i> sp.    | Jeddah, Saudi Arabia                                     | no cytotoxicity against P388, HuCCT, DLD-1 and CCD-966SK cell lines (IC <sub>50</sub> > 20 µg/mL) (Almar Blue assay, triplicate); anti-inflammatory activity toward inhibiting O <sub>2</sub> <sup>-</sup> generation (IC <sub>50</sub> = 5.31 ± 1.52 µM) but no inhibition against elastase release | [27] |
|     |                      |                        | <i>S. officinalis</i> | Shui Niupo Village, Danzhou City, Hainan Province, China | no cytotoxicity against K562, H69AR, ASPC-1 and MDA-MB-231 cell lines (SRB assay and MTT assay, triplicate); no signalling inhibition of TAT3/NF-κB, HIF-1 and Wnt                                                                                                                                   | [29] |
| 191 | (±)-pokepola ester B | linear furanoterpenoid | <i>S. officinalis</i> | Shui Niupo Village, Danzhou City, Hainan Province, China | cytotoxicity against MDA-MB-231, K562 and ASPC-1 cell lines (IC <sub>50</sub> = 17.4, 28.0 and 11.0 µM, respectively), but no cytotoxicity against H69AR cell line (SRB assay and MTT assay, triplicate); no signalling inhibition of TAT3/NF-κB, HIF-1 and Wnt                                      | [29] |
| 192 | (±)-pokepola ester C | linear furanoterpenoid | <i>S. officinalis</i> | Shui Niupo Village, Danzhou City, Hainan Province, China | no cytotoxicity against K562, H69AR, ASPC-1 and MDA-MB-231 cell lines (SRB assay and MTT assay, triplicate); signalling inhibition of TAT3/NF-κB, HIF-1 and Wnt                                                                                                                                      | [29] |
| 193 | (±)-pokepola ester D | linear furanoterpenoid | <i>S. officinalis</i> | Shui Niupo Village, Danzhou City, Hainan Province, China | cytotoxicity against MDA-MB-231 cell lines (IC <sub>50</sub> = 23.6 µM), but no cytotoxicity against K562, H69AR and ASPC-1 cell lines (SRB assay and MTT assay, triplicate); no signalling inhibition of TAT3/NF-κB, HIF-1 and Wnt                                                                  | [29] |
| 194 | (±)-pokepola ester E | linear furanoterpenoid | <i>S. officinalis</i> | Shui Niupo Village, Danzhou City, Hainan Province, China | no cytotoxicity against K562, H69AR, ASPC-1 and MDA-MB-231 cell lines (SRB assay and MTT assay, triplicate); no signalling inhibition of TAT3/NF-κB, HIF-1 and Wnt                                                                                                                                   | [29] |
| 195 | (±)-sponalisolide C  | linear furanoterpenoid | <i>S. officinalis</i> | Shui Niupo Village, Danzhou City, Hainan Province, China | no cytotoxicity against K562, H69AR, ASPC-1 and MDA-MB-231 cell lines (SRB                                                                                                                                                                                                                           | [29] |

| No  | Name                                                                      | Class                  | Species               | Locality                                                 | Bioassays                                                                                                                                                                                                                                                            | Ref  |
|-----|---------------------------------------------------------------------------|------------------------|-----------------------|----------------------------------------------------------|----------------------------------------------------------------------------------------------------------------------------------------------------------------------------------------------------------------------------------------------------------------------|------|
|     |                                                                           |                        |                       |                                                          | assay and MTT assay, triplicate); no signalling inhibition of TAT3/NF- $\kappa$ B, HIF-1 and Wnt                                                                                                                                                                     |      |
| 196 | (-)-sponalisolide D                                                       | linear furanoterpenoid | <i>S. officinalis</i> | Shui Niupo Village, Danzhou City, Hainan Province, China | no cytotoxicity against K562, H69AR, ASPC-1 and MDA-MB-231 cell lines (SRB assay and MTT assay, triplicate); no signalling inhibition of TAT3/NF- $\kappa$ B, HIF-1 and Wnt                                                                                          | [29] |
| 197 | stigmsta-4,6,8(14),22-tetraen-3-one                                       | steroid                | <i>Spongia</i> sp.    | Xisha Islands, China                                     | no antifungal activity against <i>C. albicans</i> , <i>T. rubrum</i> and <i>T. mentagrophytes</i> (Dilution assay)                                                                                                                                                   | [44] |
| 198 | 3-oxo-4,6,8(14)-triunsaturated steroid                                    | steroid                | <i>Spongia</i> sp.    | Xisha Islands, China                                     | no antifungal activity against <i>C. albicans</i> , <i>T. rubrum</i> and <i>T. mentagrophytes</i> (Dilution assay)                                                                                                                                                   | [44] |
| 199 | ergosta-4,6,8(14),22-tetraen-3-one                                        | steroid                | <i>Spongia</i> sp.    | Xisha Islands, China                                     | antifungal activity against <i>T. rubrum</i> (MIC <sub>80</sub> = 25 $\mu$ g/mL), but no antifungal activity against <i>C. albicans</i> and <i>T. mentagrophytes</i> (Dilution assay)                                                                                | [44] |
| 200 | cholesta-7-ene-3 $\beta$ ,5 $\alpha$ -diol-6-one                          | steroid                | <i>Spongia</i> sp.    | Jeddah, Saudi Arabia                                     | no cytotoxicity against P388, HuCCT, DLD-1 and CCD-966SK cell lines (IC <sub>50</sub> > 20 $\mu$ g/mL) (Almar Blue assay, triplicate); no anti-inflammatory activity toward inhibiting O <sub>2</sub> <sup>-</sup> generation and elastase release                   | [27] |
| 201 | 3 $\beta$ ,5 $\alpha$ ,9 $\alpha$ -trihydroxy-24S-ethylcholest-7-en-6-one | steroid                | <i>Spongia</i> sp.    | Jeddah, Saudi Arabia                                     | no cytotoxicity against the Huh7 cell line (MTT assay, triplicate); no antibacterial activity against <i>S. aureus</i> ; no anti-inflammatory activity toward inhibiting O <sub>2</sub> <sup>-</sup> generation and elastase release (IC <sub>50</sub> > 20 $\mu$ M) | [15] |
| 202 | (22E,24S)-ergosta-7,22-dien-3 $\beta$ ,5 $\alpha$ -diol-6,5-olide         | steroid                | <i>Spongia</i> sp.    | Jeddah, Saudi Arabia                                     | no cytotoxicity against the Huh7 cell line (MTT assay, triplicate); no antibacterial activity against <i>S. aureus</i> ; no anti-inflammatory activity toward inhibiting O <sub>2</sub> <sup>-</sup> generation and elastase release (IC <sub>50</sub> > 20 $\mu$ M) | [15] |
| 203 | /                                                                         | alkaloid               | <i>Spongia</i> sp.    | Tong-Yong City, Korea                                    | no antagonistic activity against FXR (Co-transfection assay); no cytotoxicity                                                                                                                                                                                        | [53] |

| No  | Name                                                                                                               | Class    | Species               | Locality                    | Bioassays                                                                                                                                                                                                                                                                                                                                                        | Ref  |
|-----|--------------------------------------------------------------------------------------------------------------------|----------|-----------------------|-----------------------------|------------------------------------------------------------------------------------------------------------------------------------------------------------------------------------------------------------------------------------------------------------------------------------------------------------------------------------------------------------------|------|
|     |                                                                                                                    |          |                       |                             | against CV-1 cell line (MTT assay, triplicate)                                                                                                                                                                                                                                                                                                                   |      |
| 204 | /                                                                                                                  | alkaloid | <i>Spongia</i> sp.    | Tong-Yong City, Korea       | no antagonistic activity against FXR (Co-transfection assay); no cytotoxicity against CV-1 cell line (MTT assay, triplicate)                                                                                                                                                                                                                                     | [53] |
| 205 | 1,3,7-trimethylguanine                                                                                             | alkaloid | <i>S. irregularis</i> | Ras Mohamed, Sinai, Egypt   | no inhibitory against HCV (Molecular docking calculations)                                                                                                                                                                                                                                                                                                       | [31] |
| 206 | thymidine                                                                                                          | alkaloid | <i>S. irregularis</i> | Ras Mohamed, Sinai, Egypt   | no inhibitory against HCV (Molecular docking calculations)                                                                                                                                                                                                                                                                                                       | [31] |
|     |                                                                                                                    |          | <i>Spongia</i> sp.    | Jeddah, Saudi Arabia        | antibacterial activity against <i>S. aureus</i> (inhibition rate 89% at 200 $\mu$ M); no cytotoxicity against Huh7 cell line (MTT assay, triplicate); no anti-inflammatory activity toward inhibiting O <sub>2</sub> <sup>-</sup> generation and elastase release (IC <sub>50</sub> > 20 $\mu$ M)                                                                | [15] |
| 207 | 1 <i>H</i> -indazole                                                                                               | alkaloid | <i>S. irregularis</i> | Ras Mohamed, Sinai, Egypt   | no inhibitory against HCV (Molecular docking calculations)                                                                                                                                                                                                                                                                                                       | [31] |
|     |                                                                                                                    |          | <i>Spongia</i> sp.    | Zhanjiang, Guangdong, China | —                                                                                                                                                                                                                                                                                                                                                                | [30] |
| 208 | spongiacysteine                                                                                                    | alkaloid | <i>S. irregularis</i> | Ras Mohamed, Sinai, Egypt   | no inhibitory against HCV (Molecular docking calculations)                                                                                                                                                                                                                                                                                                       | [31] |
| 209 | dysidamide                                                                                                         | alkaloid | <i>Spongia</i> sp.    | Jeddah, Saudi Arabia        | no cytotoxicity against Huh7 cell line (MTT assay, triplicate); no antibacterial activity against <i>S. aureus</i> ; anti-inflammatory activity toward inhibiting elastase release (IC <sub>50</sub> = 17.23 $\pm$ 2.45 $\mu$ M), but no anti-inflammatory activity toward inhibiting O <sub>2</sub> <sup>-</sup> generation (IC <sub>50</sub> > 20 $\mu$ M)     | [15] |
| 210 | 7,7,7-trichloro-3-hydroxy-2,2,6-trimethyl-4-(4,4,4-trichloro-3-methyl-1-oxobutylamino)-heptanoic acid methyl ester | alkaloid | <i>Spongia</i> sp.    | Jeddah, Saudi Arabia        | no cytotoxicity against the Huh7 cell line (MTT assay, triplicate); no antibacterial activity against <i>S. aureus</i> ; anti-inflammatory activity toward inhibiting elastase release (IC <sub>50</sub> = 14.60 $\pm$ 2.24 $\mu$ M), but no anti-inflammatory activity toward inhibiting O <sub>2</sub> <sup>-</sup> generation (IC <sub>50</sub> > 20 $\mu$ M) | [15] |
| 211 | 1 <i>H</i> -indole-3-carbaldehyde                                                                                  | alkaloid | <i>Spongia</i> sp.    | Zhanjiang, Guangdong, China | —                                                                                                                                                                                                                                                                                                                                                                | [30] |
| 212 | 1 <i>H</i> -indole-3-carboxylic acid                                                                               | alkaloid | <i>Spongia</i> sp.    | Zhanjiang, Guangdong, China | —                                                                                                                                                                                                                                                                                                                                                                | [30] |

| No  | Name                                                                                        | Class     | Species               | Locality                    | Bioassays                                                                                                                                                                                                                                                   | Ref  |
|-----|---------------------------------------------------------------------------------------------|-----------|-----------------------|-----------------------------|-------------------------------------------------------------------------------------------------------------------------------------------------------------------------------------------------------------------------------------------------------------|------|
| 213 | 1 <i>H</i> -indole-3-carboxylic acid acetate                                                | alkaloid  | <i>Spongia</i> sp.    | Zhanjiang, Guangdong, China | —                                                                                                                                                                                                                                                           | [30] |
| 214 | spongimide A                                                                                | alkaloids | <i>Spongia</i> sp.    | Zhanjiang, Guangdong, China | no cytotoxicity against K562 cell line (CCK-8 assay, triplicate); no antibacterial activity against <i>Salmonella paratyphi</i> and <i>E. coli</i>                                                                                                          | [54] |
| 215 | spongimide B                                                                                | alkaloid  | <i>Spongia</i> sp.    | Zhanjiang, Guangdong, China | no cytotoxicity against K562 cell line (CCK-8 assay, triplicate); no antibacterial activity against <i>Salmonella paratyphi</i> and <i>E. coli</i>                                                                                                          | [54] |
| 216 | ( <i>S</i> )-tetrahydro-1 <i>H</i> -pyrrolo[1,2- <i>c</i> ]imidazole-1,3(2 <i>H</i> )-dione | alkaloid  | <i>Spongia</i> sp.    | Zhanjiang, Guangdong, China | —                                                                                                                                                                                                                                                           | [54] |
| 217 | ( <i>S</i> )-5-isopropylhydantoin                                                           | alkaloid  | <i>Spongia</i> sp.    | Zhanjiang, Guangdong, China | —                                                                                                                                                                                                                                                           | [54] |
| 218 | <i>N</i> -(4-hydroxyphenethyl)succinimide                                                   | alkaloid  | <i>Spongia</i> sp.    | Zhanjiang, Guangdong, China | —                                                                                                                                                                                                                                                           | [54] |
| 219 | methyl hematin                                                                              | alkaloid  | <i>Spongia</i> sp.    | Zhanjiang, Guangdong, China | —                                                                                                                                                                                                                                                           | [54] |
| 220 | L-pyroglutamic acid methyl ester                                                            | alkaloid  | <i>Spongia</i> sp.    | Zhanjiang, Guangdong, China | —                                                                                                                                                                                                                                                           | [54] |
| 221 | 3,5-dihydroxyfuran-2(5 <i>H</i> )-one                                                       | others    | <i>S. irregularis</i> | Ras Mohamed, Sinai, Egypt   | no inhibitory against HCV (Molecular docking calculations)                                                                                                                                                                                                  | [31] |
| 222 | ( <i>Z</i> )-3-methyl-9-oxodec-2-enoic acid                                                 | others    | <i>Spongia</i> sp.    | Jeddah, Saudi Arabia        | no antibacterial activity against <i>S. aureus</i> ; no cytotoxicity against Huh7 cell line (MTT assay, triplicate); no anti-inflammatory activity toward inhibiting O <sub>2</sub> <sup>-</sup> generation and elastase release (IC <sub>50</sub> > 20 μM) | [15] |

<sup>1</sup> '—' indicates no bioassay was reported in the reference.

<sup>2</sup> '/' indicates no compound name was given in the reference.
